1 **Whole genome sequence analysis of 91 *Salmonella***  
2 **Enteritidis isolates from mice caught on poultry farms in the**  
3 **mid 1990s**

4 **Jean Guard <sup>a</sup>, Guojie Cao <sup>b</sup>, Yan Luo <sup>b</sup>, Joseph D. Baugher <sup>b</sup>, Sherrill Davison <sup>c</sup>,**  
5 **Kuan Yao <sup>b</sup>, Maria Hoffmann <sup>b</sup>, Guodong Zhang <sup>b</sup>, Rebecca Bell <sup>b</sup>, Jie Zheng <sup>b</sup>, Eric**  
6 **Brown <sup>b</sup>, Marc Allard <sup>b</sup>**

7  
8  
9 US National Poultry Research Center, US Department of Agriculture, Athens, GA,  
10 30605 <sup>a</sup>, Center for Food Safety and Applied Nutrition, Food and Drug Administration,  
11 College Park, MD, 20740 <sup>b</sup>, School of Veterinary Medicine, University of Pennsylvania,  
12 Philadelphia, PA, 19104 <sup>c</sup>

13  
14  
15  
16  
17

18 Author for Correspondence: Jean Guard, US National Poultry Research Center, US  
19 Department of Agriculture, 950 College Station Road, Athens, GA, 30605; Tel: 706-546-  
20 3446; Email: Jean.Guard@ars.usda.gov

## 21 **Abstract**

22 *Salmonella enterica* serovar Enteritidis (SE), the most commonly reported serovar of  
23 human salmonellosis, has been frequently associated with poultry farms, eggs and egg  
24 products. Mice are known vectors of SE contamination in these facilities. The objective  
25 of this study was to use whole-genome sequencing (WGS) to analyze SE from mice  
26 obtained at poultry farms in Pennsylvania. Documenting pathogen diversity can identify  
27 reliable biomarkers for rapid detection and speed up outbreak investigations. We  
28 sequenced 91 SE isolates from 83 mice (62 spleen isolates, 29 intestinal isolates)  
29 caught at 15 poultry farms between 1995-1998 using an Illumina NextSeq 500. We  
30 identified 742 single nucleotide polymorphisms (SNPs) capable of distinguishing each  
31 isolate from one another. Isolates were divided into two major clades: there were more  
32 SNPs differences within Clade B than counterparts in Clade A. All isolates containing  
33 antimicrobial resistance genes belong to Subgroup B2. Clade-defining SNPs provided  
34 biomarkers distinguishing isolates from 12 individual subgroups, which were separated  
35 by farm location or year of collection. Nonsynonymous changes from the clade-defining  
36 SNPs proffered a better understanding of possible genetic variations among these  
37 isolates. For a broader view of SE diversity, we included data from NCBI Pathogen  
38 Detection Isolates Browser, in which subgroups in Clade B formed new SNP Clusters.

39

## 40 **Importance**

41 WGS and SNPs analyses are excellent and powerful tools for investigating SE  
42 phylogenies. Identifying the evolutionary relationships among SE isolates from mouse,  
43 poultry, environmental, and clinical isolates, along with patterns of genetic diversity,

44 advances understanding of SE and the role mice may play in SE contamination and  
45 spread among poultry population. Our data was able to identify SE isolates from  
46 different farms or years of collection. Moreover, the annotations of clade-defining SNPs  
47 provided information about possible protein functions among these SE isolates from  
48 each subgroup. Clade-defining or farm-unique biomarkers were useful for rapid  
49 detection and outbreak investigations.

50 **Keywords:** *Salmonella*, WGS, phylogenetics, mouse, poultry, egg

## 51 **Introduction**

52 *Salmonella enterica* serovar Enteritidis (SE) is a long-standing public health concern in  
53 the US (1); salmonellosis can result in hospitalization or death of infants, the elderly,  
54 and those with compromised immune systems (2, 3). This pathogen has been strongly  
55 associated with poultry farms, eggs, and egg products (4, 5). In 2010, SE linked to shell  
56 eggs resulted in an outbreak requiring the recall of a half billion eggs  
57 (<https://www.cdc.gov/salmonella/2010/shell-eggs-12-2-10.html>) (6).

58 One of the challenges in resolving foodborne outbreaks associated with SE is the  
59 extreme genomic homogeneity within a specific geographic location or ecology system  
60 and its broad host range (6, 7). Mice are important biological vehicles contributing to SE  
61 dissemination and amplification in chicken houses, especially among laying hens (8, 9).  
62 In fact, SE has been strongly correlated with rodent activity; chickens in caged housing  
63 where mice are present are more likely to carry SE (10). Understanding the evolutionary  
64 relationships among SE isolates from mice, poultry, environmental surfaces, and clinical  
65 cases is important both for outbreak investigations and for identifying strains with  
66 genetic markers for virulence or capacity for rapid host adaptation, such as mutations in  
67 the mismatch repair gene *mutS* that can contribute to rapid evolution in  
68 immunocompromised hosts (11).

69 Whole genome sequencing (WGS) methods have identified variations across otherwise  
70 indistinguishable isolates from eggs and egg products (6, 12), SE associated with reptile  
71 feeder mice (13), *S. Montevideo* from red and black pepper (14). Genome-wide single  
72 nucleotide polymorphisms (SNPs) detected by WGS are considered as the most  
73 valuable genetic markers for investigating the evolutionary relationships among SE

74 homogeneous isolates (1, 7, 15). Application of WGS have also been useful in other  
75 microorganisms, including *E. coli* (16), *Vibrio cholera* (17), and *Staphylococcus aureus*  
76 (18).

77 Importantly, WGS can be also applied to historic isolates, some of which have been  
78 stored for decades. Data from those historic isolates should allow us to understand the  
79 origin and persistence of important traits. In this current project, we sequenced 91 SE  
80 isolated from 82 mice at poultry farms during the 1990s, which lets us to compare both  
81 site and host-adaptions with those of isolates from more recent sampling. Documenting  
82 these genomes and fitting them into large-scale phylogeny projects such as  
83 GenomeTrakr  
84 (<https://www.fda.gov/Food/FoodScienceResearch/WholeGenomeSequencingProgram>  
85 [WGS/ucm363134.htm](https://www.fda.gov/Food/FoodScienceResearch/WholeGenomeSequencingProgram)) and NCBI Pathogen Detection Isolates Browser  
86 (<https://www.ncbi.nlm.nih.gov/pathogens/>) will refine our understanding of SE  
87 contamination and spread in poultry facilities (19). Further, identifying and  
88 characterizing biomarkers can facilitate the development of rapid and reliable tests that  
89 could guide appropriate interventions during future outbreaks.

## 90 **Materials and Methods**

### 91 **Bacterial isolates**

92 Ninety-one SE isolates from mouse spleens (n=62) and intestines (n=29), collected  
93 from 15 poultry farms in Pennsylvania during 1995-1998, are listed in Table 1. Among  
94 these isolates, eight pairs were isolated from the spleen and intestine of the same  
95 mouse; these were designated as m1 through m8. These isolates are archived under  
96 Bioproject Number PRJNA186035 (<https://www.ncbi.nlm.nih.gov/bioproject/186035>).

### 97 **Whole genome sequencing and assembly**

98 Genomic DNA was extracted after incubation of culture for 16 hours at 37 °C in  
99 Trypticase Soy Broth (TSB) using the DNeasy Blood and Tissue Kit (Qiagen Inc,  
100 Valencia, CA). Concentrations of DNA were measured using a Qubit 3.0 fluorometer  
101 (Life Technologies, MD). Libraries were prepared according to Nextera XT protocols  
102 and sequenced on the Illumina NextSeq 500 (Illumina, San Diego, CA) using NextSeq  
103 500/550 High Output Kit v2 (300 cycles). Raw reads were assembled *de novo* using  
104 SPAdes software v3.8.2 with default settings (20). We obtained chromosome draft  
105 genomes between 4.69M bps and 4.80M bps. These genomes were annotated using  
106 the NCBI Prokaryotic Genome Annotation Pipeline (PGAP) (21).  
107 We selected SE CFSAN051873 (spleen, 1996, Farm VIII) to serve as the reference  
108 genome, using the PacBio platform we obtained a fully closed genome for  
109 CFSAN051873 as follows (22). Genomic DNA was sheared into approximately 20-kb  
110 fragments using g-TUBE (Covaris, Inc., Woburn, MA). The library was prepared based  
111 on the 20-kb PacBio sample preparation protocol and sequenced using P6/C4  
112 chemistry on four single-molecule real-time (SMRT) cells with a 240-min collection time.

113 The continuous long-read data were *de novo* assembled using the PacBio hierarchical  
114 genome assembly process (HGAP version 3.0) with default parameters (23). The  
115 assembled sequence was annotated using PGAP (21).

## 116 **Genomic and phylogenetic analysis**

117 The Fastq data from NextSeq runs were put into the Center for Food Safety and Applied  
118 Nutrition (CFSAN) SNP pipeline v0.8 to create a SNP matrix (24) with SE  
119 CFSAN051873 (CP\_022003.1) as the reference genome. GARLI (Genetic Algorithm for  
120 Rapid Likelihood Inference: <https://code.google.com/archive/p/garli/>) v2.01 (25) was  
121 used to construct maximum-likelihood (ML) phylogenetic trees (ratematrix = 6rate;  
122 ratehetmodel = gamma). Multiple runs were performed (n=100) to ensure that results  
123 were consistent. To estimate support for each node, phylogenies were created for 1,000  
124 bootstrap replicates of the data set from GARLI. Python program SumTrees was used  
125 to generate one consensus tree with bootstrap values at a 70% threshold  
126 (<https://pythonhosted.org/DendroPy/programs/sumtrees.html>) and FigTree v 1.4.3 was  
127 used to export the figures (<http://tree.bio.ed.ac.uk/software/figtree/>). NCBI Pathogen  
128 Detection Isolates Browser (<https://www.ncbi.nlm.nih.gov/pathogens>) was used to show  
129 phylogenetic relationship among SE isolates from broader ranges of geographical  
130 locations and sources. Custom script was used to identify clade-defining SNPs and Tool  
131 for Rapid Annotation of Microbial SNPs (TRAMS) tool to perform annotations on clade-  
132 defining SNPs (26). The pairwise distance matrix, shown as number of SNP differences  
133 among isolates, was calculated using MEGA7 with 1,000 bootstrap iterations (27).

## 134 **Results**

### 135 **Phylogenetic analysis**

#### 136 **Overview**

137 We identified 742 SNPs and generated the maximum-likelihood phylogenetic tree  
138 arising from these SNPs, as depicted in Fig 1. Tree tips were marked using  
139 isolate name, source, year, farm, and NCBI Pathogen Detection Isolates Browser  
140 SNP Cluster. For example, CFSAN051866 was labeled as  
141 CFSAN051866\_spleen\_1996\_FarmVII\_SCA, which provides the following  
142 details: this bacterium was isolated from a mouse spleen in 1996, that mouse  
143 came from Farm VII, and the isolate fits within SNP Cluster A (28), which was  
144 designated according to the NCBI Pathogen Detection Isolates Browser (Table  
145 1). Subgroup names and the number of clade-defining SNPs were labeled on the  
146 internal branches. For example, Subgroup B1 had the most clade-defining SNPs  
147 (179 SNPs), while Subgroup A5 had only 6 clade-defining SNPs.

#### 148 **Phylogenetic Tree Construction**

149 We recognized two major clades: Clades A and B, which further subdivided into  
150 12 subgroups: A1 to A8 and B1 to B4. It was notable that all isolates carrying  
151 antimicrobial resistance genes belonged exclusively to Subgroup B2. Moreover,  
152 isolates in each subgroup had varied ranges of SNP differences. The maximum  
153 SNP differences within Subgroups A1 and A5 were 33 (CFSAN063779 and  
154 CFSAN063803) and 27 (CFSAN063788 and CFSAN063792) SNPs, respectively,  
155 while the maximum number in Subgroup A3 was only 6 SNPs (CFSAN051856  
156 and CFSAN051861). Subgroups A1 and A2 were the two largest subgroups,



157 containing 18 and 17 isolates, respectively. Subgroup B3 only contained two  
158 isolates, as the smallest group in the tree.

### 159 **Impact of Farm**

160 Not all subgroups in each clade showed the same pattern of geographic  
161 distribution, although some subgroups were exclusively comprised of isolates  
162 from a single farm. For example, all Subgroup A2 isolates were from Farm III and  
163 all Subgroup B1 isolates from Farm X. In contrast, Subgroups B3 only contained  
164 two from Farm I; A3 contained isolates from Farms V and VII.

165 Our phylogeny revealed that some isolates from different farms can be grouped  
166 together and were closely related: isolates in Subgroup A3 obtained from Farms  
167 V and VII with few to no SNP differences among them. For example,  
168 CFSAN051854 (CFSAN051854\_spleen(m7)\_1996\_FarmV\_SCA) and  
169 CFSAN051864 (CFSAN051864\_spleen\_1996\_FarmVII\_SCA) where zero SNP  
170 differences were observed (Table S1).

171 Isolates from some farms were only distantly related and, unsurprisingly, our  
172 phylogeny showed these belonging to different subgroups. For example,  
173 Subgroups B1 and B2 both contained isolates from Farm X, indicating that these  
174 were distantly related to the rest of the isolates from our sequencing.

175 There were several cases in which isolates from different farms were found to  
176 belong to the same subgroup: isolates from Subgroup B2, which contained 11  
177 clade-defining SNPs, came from Farms VI, X, and XI. Isolates in Subgroup A3  
178 were found at Farms V and VII, and there were only very small differences  
179 among their SNPs (Table S1).

180 Although isolates in Subgroups A1 and A5 were found at different farms, isolates  
181 from the same farm shared common ancestors. Specifically, all Subgroup A1  
182 isolates were from Farm XII and XV, isolates from Farm XII formed a cluster and  
183 shared a common ancestor, and another common ancestor was shared by all  
184 isolates collected from Farm XV.

### 185 **Impact of Isolation Year**

186 Isolates in each subgroup were collected during the same year, with only two  
187 exceptions: A1 contained isolates from 1995 and 1996, and A5 contained  
188 isolates from 1997 and 1998. In Subgroup A1, isolates from 1995 were grouped  
189 together sharing common ancestor, which also applied to those from 1996 in  
190 Subgroup A1. In another case, all Subgroup A5 isolates were collected from  
191 1998 except CFSAN063788, which was from 1997.

### 192 **Impact of Isolation Organ**

193 As expected, isolates from the same mouse appeared very closely related: SNP  
194 differences ranged from zero (m8) to two SNPs (m2). Most subgroups contained  
195 isolates from both organs. Although Subgroups A4, A8, B3, and B4 only  
196 contained isolates originating from spleens, our phylogenetic analyses did not  
197 reveal any organ-defining SNPs that could be reliably used to distinguish  
198 between SE isolates taken from spleens and those obtained from intestines.

### 199 **Pathogen Detection SNP Cluster analysis**

200 At the time of this research (Dec 7<sup>th</sup>, 2017), the NCBI Pathogen Detection  
201 Isolates Browser (<https://www.ncbi.nlm.nih.gov/pathogens>) contained more than  
202 94,000 *Salmonella enterica* genomes. At the time of our analysis, 86 of our

203 isolates fit into five existing Pathogen Detection SNP Clusters, as follows. All 68  
204 isolates, but CFSAN063803, within our eight Clade A subgroups belonged to one  
205 single Pathogen Detection SNP Cluster, which was designated as SNP Cluster A  
206 (SCA, at the time designated as SCA PDS000002757.323) (28). CFSAN063803  
207 did not fit within any of the established SNP Cluster at that time. The four  
208 subgroups we recognized as Clade B belonged to four different Pathogen  
209 Detection SNP Clusters, which were designated as SCB, SCC, SCD, and SCE,  
210 respectively.

211 The data from Pathogen Detection Isolates Browser matched our phylogenetic  
212 analysis. Among our sequenced isolates, some farms contained isolates that  
213 were distantly related according to Pathogen Detection Isolates Browser data.  
214 For example, isolates collected from mice at Farm I, which we identified as  
215 Subgroups A8, B3, and B4, were members of three existing Pathogen Detection  
216 SNP Clusters: SCA, SCB, and SCC, respectively.

217 Our isolates in SCA had been collected from mice at 12 different farms between  
218 1995 and 1998. However, SCA also encompassed 5,468 genomes already in the  
219 Pathogen Detection Isolates Browser. This provides the opportunity to explore  
220 additional levels of relatedness across SE isolates, as well as identify patterns  
221 across multiple years. For example, in the Pathogen Detection phylogenetic tree,  
222 Subgroup A1 isolates from 1995 shared a common ancestor with SE  
223 NYVetLIRN-37 (Sequence Read Archive (SRA) number: SRR6107632), which  
224 was isolated from dust taken from a poultry coop at Massachusetts in April 2017  
225 (<https://www.ncbi.nlm.nih.gov/Structure/tree/#!/tree/Salmonella/PDG000000002.1>

226 124/PDS000002757.351). Another example, SE WAPHL\_SAL-A00192, which  
227 was isolated from an avian source from Washington in 2003, shared a common  
228 ancestor with Subgroup A5 isolates  
229 (<https://www.ncbi.nlm.nih.gov/Structure/tree/#!/tree/Salmonella/PDG000000002.1>  
230 [124/PDS000002757.351](https://www.ncbi.nlm.nih.gov/Structure/tree/#!/tree/Salmonella/PDG000000002.1)).

231 It was notable that isolates from egg yolk and chicken drag swab appeared  
232 closely related to isolates in Subgroups A4 and A6. For example, SE  
233 CRJJGF\_00137 (egg yolk, 2002, US, SRR1686612) and SE OH-10-18938-5  
234 (chicken drag swab, 2010, Ohio, SRR5278942) were closely related to  
235 CFSAN051834 and CFSAN051835 in Subgroup A4  
236 (<https://www.ncbi.nlm.nih.gov/Structure/tree/#!/tree/Salmonella/PDG000000002.1>  
237 [124/PDS000002757.351](https://www.ncbi.nlm.nih.gov/Structure/tree/#!/tree/Salmonella/PDG000000002.1)).

238 The SCB (designated at that time as PDS000004690.16) encompassed a total of  
239 24 isolates including those five isolates of our Subgroup B4. These 24 isolates in  
240 SCB were obtained from human, animal, food, and environmental sources in US  
241 and Canada (Figure 2). Within SCB, our Subgroup B4 isolates were clustered  
242 together and shared a most recent common ancestor with five NCBI isolates  
243 collected from human stool (SE PNUSAS011122, US, 2016), turkey (SE  
244 SA19943269, Canada), and chicken drag swab (SE OH-15-14655, OH, US,  
245 2015, SE OH-12-29345, OH, US, 2012 & SE OH-13-28244, OH, US, 2013). The  
246 remaining 14 isolates in SCB formed a separate cluster, these were 13 clinical  
247 isolates and one environmental isolate that all shared a different common

248 ancestor from the rest of SCB. The minimum distance between isolates in SCB  
249 was one SNP while the maximum number was 104.  
250 SCC (designated at that time as PDS000011158.1) consisted of two isolates  
251 from Subgroup B3. No other genomes from Pathogen Detection Isolates Browser  
252 fit within SCC. Similarly, no other NCBI genome fit within SCD (designated at that  
253 time as PDS000011157.1), which contained only Subgroup B1 isolates.  
254 SCE (designated at that time as PDS000004693.11) comprised 20 isolates from  
255 chicken, mouse, and human. These isolates had been collected from the states  
256 of Tennessee, Georgia, and Pennsylvania, in the US. Eight of the Subgroup B2  
257 isolates that fit within SCE shared a common ancestor (Figure 3). Intriguingly, all  
258 SCE isolates, with the exception isolate PNUSAS014592, carried at least one of  
259 following antimicrobial resistance genes: *tetA*, *aadA*, *bla<sub>TEM-1</sub>*  
260 ([https://www.ncbi.nlm.nih.gov/pathogens/isolates#/tree/Salmonella/PDG000000000](https://www.ncbi.nlm.nih.gov/pathogens/isolates#/tree/Salmonella/PDG0000000002.1056/PDS000004693.11/)  
261 [02.1056/PDS000004693.11/](https://www.ncbi.nlm.nih.gov/pathogens/isolates#/tree/Salmonella/PDG0000000002.1056/PDS000004693.11/)).

## 262 **Clade-defining SNPs**

263 We identified clade-defining SNPs and annotations identifying  
264 synonymous/nonsynonymous changes in amino acids, positions in reference  
265 genes, strands, and gene functions are presented in Table 3.

## 266 **Clade A polymorphisms**

267 We identified 11 SNPs that defined Subgroup A1, including seven  
268 nonsynonymous changes, three synonymous changes, and one nonsense  
269 mutation. Type VI secretion protein IcmF (reference locus tag BCA92\_14555)  
270 contained one C to A mutation, which resulted in amino acid changing A to D.

271 Another unique genetic signature change within Subgroup A1 occurred in the  
272 colanic acid synthesis gene *wcaF* (BCA92\_08715), which changed C to T  
273 change. The nonsense mutation resulted in a stop codon which interrupted *hpaE*  
274 (BCA92\_14790), encoding for enzymes involved in catabolism in the aromatic  
275 pathway.

276 In Subgroup A2, which contained isolates exclusively from Farm III, we  
277 discovered 19 clade-defining SNPs, including 16 in coding region. The LysR  
278 family transcriptional regulator (dBCA92\_19265) contained one G to A mutation  
279 resulting in a stop codon.

280 Other notable findings in other subgroups included nonsynonymous mutations in  
281 *zwf* (Subgroup A3, BCA92\_10040, oxidoreductase in glucose metabolism), *asnB*  
282 (Subgroup A3, BCA92\_16545, asparagine synthase B), *ushA* (Subgroups A4&A5  
283 and A6, BCA92\_17470, 5'-nucleotidase), and *frsA* (Subgroup A6, BCA92\_18395,  
284 esterase).

### 285 **Clade B polymorphisms**

286 Among the 179 clade-defining SNPs in Subgroup B1, 146 SNPs were in coding  
287 regions, including 85 nonsynonymous mutations and four nonsense mutations.  
288 Subgroup B2, which contained isolates carrying resistance genes, contained 11  
289 SNPs with nine in coding regions. Among the isolates in Subgroups B3 and B4,  
290 we identified multiple nonsynonymous mutations, including *deoD*  
291 (BCA92\_20135, purine-nucleoside phosphorylase), *cysQ* (BCA92\_20970,  
292 3'(2'),5'-bisphosphate nucleotidase activity and magnesium ion binding), *hisD*  
293 (BCA92\_08915, histidinol dehydrogenase and zinc ion binding), *tolA*

- 294 (BCA92\_16260, cell envelope integrity protein in transporter activity), and *fimH*
- 295 (BCA92\_19875, fimbrial adhesion).

## 296 **Discussion**

297 The dissemination of SE via mice, particularly on poultry farms, is considered to be one  
298 of the most serious threats to poultry industry today (2). Here, we characterized a set of  
299 91 SE that (i) represented two organs in mice that have been associated with  
300 dissemination of SE among poultry and hence to humans, (ii) were isolated at 15 farms  
301 in Pennsylvania during the mid-1990s, which was a time during which few SE isolates  
302 from mice have previously been sequenced, and (iii) analyzed in combination with the  
303 open access NCBI Pathogen Detection Isolates Browser. These steps allow us to  
304 construct a more nuanced picture of SE dissemination during the 1990s, and also  
305 identify connections between historic isolates and current SE phenotypes.

306 Our study demonstrated that WGS not only reliably distinguishes among closely related  
307 SE isolates from mice and trace a genome back to its farm of origin and year of  
308 isolation, but also allows sufficient resolution to distinguish between SE isolates, even  
309 those collected from different organs (spleens and intestines) of individual mouse. In  
310 addition, our analyses showed that (i) isolates carrying antimicrobial resistance genes  
311 formed a separate subgroup, which could indicate a shared mechanism which enables  
312 that feature, (ii) open access WGS database contributes comprehensive perspectives to  
313 our understanding of selected isolates, and (iii) new clade-defining markers and NCBI  
314 Pathogen Detection Isolates Browser SNP Clusters were identified, offering tool with  
315 high resolution in outbreak investigations and rapid detections to identify specific clade  
316 related to certain years or locations.

317 Our results strongly suggested it was possible for unique ecologies of SE to develop on  
318 individual farms, although local adaptation is not inevitable. Farms I and X exemplify this



319 range of possibilities: Farm I exhibited heterogeneous isolates while isolates from Farm  
320 X were shown to be highly similar. Isolates can spread from one location to another in  
321 multiple ways: insects (29), wild birds (30), wild animals (31, 32), and even wind (33)  
322 can move contamination from one place to another. However, among these possible  
323 transmission routes, mice are ubiquitous pests (8-10), and their behaviors may help  
324 shape those unique local ecologies: mice migrate periodically and also defend their  
325 territories. Understanding the genetic relatedness among the SE carried by mice and  
326 the SE found in veterinary, food, and human sampling will help improve safety and  
327 security in poultry industry.

328 **WGS data identified a subgroup consisting exclusively of isolates carrying**  
329 **antimicrobial resistance genes.**

330 Previously, WGS has been used to differentiate drug-resistant *S. enterica* isolates from  
331 different locations, which can exhibit notable differences in resistant-relevant genotypic  
332 and phenotypic characteristics (34). Other research has shown WGS can be valuable in  
333 predicting phenotypic resistance among both *S. enterica* (34, 35) and *E. coli* (36). In the  
334 current study, WGS analyses revealed that all our Subgroup B2 isolates carried *bla*<sub>TEM-1</sub>  
335 and *tetA*. It is possible that Subgroup B2 isolates share specific genetic features that  
336 permit them to obtain and carry antimicrobial resistance genes via horizontal gene  
337 transfer, or make it more likely for those genes to be maintained. For example, bacteria  
338 that carry non-functional Clustered Regularly Interspaced Short Palindromic Repeats  
339 (CRISPR) /cas system could acquire plasmids carrying antimicrobial resistance genes.  
340 Possession of a fully-functioning CRISPR/cas system is reversely correlated with  
341 antimicrobial resistance in bacteria (37-39).

342 **Open access genome databases allow greatly expanded genomic and**  
343 **phylogenetic investigations**

344 In the NCBI Pathogen Detection Isolates Browser, comprehensive data was available  
345 for each genome, including up to 40 columns of detail such as WGS run qualities,  
346 outbreak relatedness, and antimicrobial resistance genotypes. The Browser also  
347 assigns specific cluster ID numbers computed based on SNP distances. Although these  
348 cluster numbers can change as new information is added to the Browser, this feature  
349 allows researchers to quickly identify isolates most closely related to target isolates,  
350 which can assist in recognizing possible connections among clinical illness cases. The  
351 phylogenetic analyses from the Browser were consistent with our phylogenetic tree.  
352 Multiple subgroups in the current study formed distinct SNP Clusters containing isolates  
353 exclusively from our collection, like B3 isolates in SCC. We identified clinical isolates  
354 and poultry related isolates closely related to our isolates, such as SE PNUSAS011122  
355 (human stool, US, 2016) and SE OH-15-14655 (chicken drag swab, OH, US, 2015) with  
356 B4 isolates in SCB. Our data has the potential to bridge surveillance data with long-  
357 term and large-scale genomics and phylogenetics studies (19).

358 **Genetic variations in clade-defining SNPs showed possible unique genotypic and**  
359 **phenotypic features.**

360 Distinctive genetic features are extremely useful for epidemiologic investigations.  
361 Finding such genetic identifiers can help rapidly determine outbreak lineages and  
362 accurately distinguish highly clonal clades (6). The nonsynonymous changes we  
363 identified in this study suggested that a combination of several genetic factors has  
364 facilitated the survival and growth of SE, resulting in different contamination risks for

365 each subgroup. For example, the *icmF* we identified in Subgroup A1 was part of Type  
366 VI Secretion System, which is known to be required for full virulence in mice (40, 41).  
367 Similarly, *fimH* alleles have been associated with the abilities of *Salmonella* to bind onto  
368 avian or mammalian cells (42). Despite the clonal structure of SE, isolates vary greatly  
369 in the ability to contaminate eggs, which is biologically independent of phage types  
370 those isolates belong to (15, 43, 44). The heterogeneity of metabolic profiles in SE  
371 isolates might provide an explanation for the variation in contamination capability (15).  
372 The accumulation of mutations that affect gene function is a significant part of the  
373 process by which *S. enterica* becomes host adapted (45). Such host adaptations may  
374 well be occurring at some of the farms where we collected SE from local mice, with  
375 important consequences for the safety and security of the poultry supply chain. Notably,  
376 serovars Enteritidis, Gallinarum, and Pullorum can circulate within the same farm, and  
377 sometimes within the same bird, as evidenced by field analyses conducted in South  
378 America (46). Therefore, WGS also has potential for detecting evolutionary trends within  
379 SE that could threaten the poultry industry supply chain. Our data also pave the way for  
380 research on poultry pathogenic serovars *S. Gallinarum* and *S. Pullorum*, which diverged  
381 independently from an Enteritidis-like ancestor (3, 47, 48).

## 382 **Acknowledgements**

383 The authors thank Dr. Lili Fox Vélez for scientific writing support and Oak Ridge Institute  
384 for Science and Education (ORISE) Research Participation Program at the U.S. Food  
385 and Drug Administration support on this project.

## 386 **Figure Legends**

387

388 Figure 1. Maximum likelihood phylogenetic tree of 91 *S. Enteritidis* isolates from mice  
389 spleens and intestines. We constructed the phylogenetic tree using 742 single  
390 nucleotide polymorphisms (SNPs). All sequenced isolates were divided into two major  
391 clades, Clade A and B, which were further grouped into 12 subgroups.

392

393 Figure 2. Phylogenetic tree of SNP Cluster B (SCB, designated at that time as  
394 PDS000004690.16) from NCBI Pathogen Detection Isolates Browser. The phylogenetic  
395 tree encompassed 24 isolates including our five sequenced isolates belonging to  
396 Subgroup B4.

397

398 Figure 3. Phylogenetic tree of SNP Cluster E (SCE, designated at that time as  
399 PDS000004693.11) from NCBI Pathogen Detection Isolates Browser. The phylogenetic  
400 tree encompassed 20 isolates including our eight sequenced isolates belonging to  
401 Subgroup B2.

402

403

404

405

406

407

408

409

410

411

412

413

414

415

## 416 References

- 417 1. Zheng J, Pettengill J, Strain E, Allard MW, Ahmed R, Zhao S, Brown EW. 2014. Genetic  
418 diversity and evolution of *Salmonella enterica* serovar Enteritidis strains with different  
419 phage types. J Clin Microbiol 52:1490-500.
- 420 2. Darrell Trampel TH, Richard Gast. 2014. Integrated farm management to prevent  
421 *Salmonella* Enteritidis contamination of eggs. Journal of Applied Poultry Research  
422 2014:353-365.
- 423 3. Thomson NR, Clayton DJ, Windhorst D, Vernikos G, Davidson S, Churcher C, Quail MA,  
424 Stevens M, Jones MA, Watson M, Barron A, Layton A, Pickard D, Kingsley RA, Bignell A,  
425 Clark L, Harris B, Ormond D, Abdellah Z, Brooks K, Cherevach I, Chillingworth T,  
426 Woodward J, Norberczak H, Lord A, Arrowsmith C, Jagels K, Moule S, Mungall K, Sanders  
427 M, Whitehead S, Chabalgoity JA, Maskell D, Humphrey T, Roberts M, Barrow PA, Dougan  
428 G, Parkhill J. 2008. Comparative genome analysis of *Salmonella* Enteritidis PT4 and  
429 *Salmonella* Gallinarum 287/91 provides insights into evolutionary and host adaptation  
430 pathways. Genome Res 18:1624-37.
- 431 4. Feasey NA, Hadfield J, Keddy KH, Dallman TJ, Jacobs J, Deng X, Wigley P, Barquist L,  
432 Langridge GC, Feltwell T, Harris SR, Mather AE, Fookes M, Aslett M, Msefula C, Kariuki S,  
433 Maclennan CA, Onsare RS, Weill FX, Le Hello S, Smith AM, McClelland M, Desai P, Parry  
434 CM, Cheesbrough J, French N, Campos J, Chabalgoity JA, Betancor L, Hopkins KL, Nair S,  
435 Humphrey TJ, Lunguya O, Cogan TA, Tapia MD, Sow SO, Tennant SM, Bornstein K, Levine  
436 MM, Lacharme-Lora L, Everett DB, Kingsley RA, Parkhill J, Heyderman RS, Dougan G,  
437 Gordon MA, Thomson NR. 2016. Distinct *Salmonella* Enteritidis lineages associated with  
438 enterocolitis in high-income settings and invasive disease in low-income settings. Nat  
439 Genet 48:1211-1217.
- 440 5. Inns T, Ashton PM, Herrera-Leon S, Lighthill J, Foulkes S, Jombart T, Rehman Y, Fox A,  
441 Dallman T, E DEP, Browning L, Coia JE, Edeghere O, Vivancos R. 2017. Prospective use of  
442 whole genome sequencing (WGS) detected a multi-country outbreak of *Salmonella*  
443 Enteritidis. Epidemiol Infect 145:289-298.
- 444 6. Allard MW, Luo Y, Strain E, Pettengill J, Timme R, Wang C, Li C, Keys CE, Zheng J, Stones  
445 R, Wilson MR, Musser SM, Brown EW. 2013. On the evolutionary history, population  
446 genetics and diversity among isolates of *Salmonella* Enteritidis PFGE pattern  
447 JEGX01.0004. PLoS One 8:e55254.
- 448 7. den Bakker HC, Allard MW, Bopp D, Brown EW, Fontana J, Iqbal Z, Kinney A, Limberger  
449 R, Musser KA, Shudt M, Strain E, Wiedmann M, Wolfgang WJ. 2014. Rapid whole-  
450 genome sequencing for surveillance of *Salmonella enterica* serovar enteritidis. Emerg  
451 Infect Dis 20:1306-14.
- 452 8. Henzler DJ, Opitz HM. 1992. The role of mice in the epizootiology of *Salmonella*  
453 enteritidis infection on chicken layer farms. Avian Dis 36:625-31.

- 454 9. Umali DV, Lapuz RR, Suzuki T, Shiota K, Katoh H. 2012. Transmission and shedding  
455 patterns of *Salmonella* in naturally infected captive wild roof rats (*Rattus rattus*) from a  
456 *Salmonella*-contaminated layer farm. *Avian Dis* 56:288-94.
- 457 10. Whiley H, Ross K. 2015. *Salmonella* and eggs: from production to plate. *Int J Environ Res*  
458 *Public Health* 12:2543-56.
- 459 11. Klemm EJ, Gkrania-Klotsas E, Hadfield J, Forbester JL, Harris SR, Hale C, Heath JN,  
460 Wileman T, Clare S, Kane L, Goulding D, Otto TD, Kay S, Doffinger R, Cooke FJ,  
461 Carmichael A, Lever AM, Parkhill J, MacLennan CA, Kumararatne D, Dougan G, Kingsley  
462 RA. 2016. Emergence of host-adapted *Salmonella* Enteritidis through rapid evolution in  
463 an immunocompromised host. *Nat Microbiol* 1:15023.
- 464 12. Inns T, Lane C, Peters T, Dallman T, Chatt C, McFarland N, Crook P, Bishop T, Edge J,  
465 Hawker J, Elson R, Neal K, Adak GK, Cleary P, Outbreak Control T. 2015. A multi-country  
466 *Salmonella* Enteritidis phage type 14b outbreak associated with eggs from a German  
467 producer: 'near real-time' application of whole genome sequencing and food chain  
468 investigations, United Kingdom, May to September 2014. *Euro Surveill* 20.
- 469 13. Sanch Kanagarajah AW, Gayle Dolan, Claire Jenkins, Philip Ashton, Antonio Isidro Carrion  
470 Martin, Robert Davies, Andrew Frost, Timothy Dallman, Elizabeth De Pinna, Jeremy  
471 Hawker, Kathie Grant, Richard Elson. 2017. Whole genome sequencing reveals an  
472 outbreak of *Salmonella* Enteritidis associated with reptile feeder mice in the United  
473 Kingdom, 2012-2015. *Food Microbiology* <http://dx.doi.org/10.1016/j.fm.2017.04.005>.
- 474 14. Lienau EK, Strain E, Wang C, Zheng J, Ottesen AR, Keys CE, Hammack TS, Musser SM,  
475 Brown EW, Allard MW, Cao G, Meng J, Stones R. 2011. Identification of a salmonellosis  
476 outbreak by means of molecular sequencing. *N Engl J Med* 364:981-2.
- 477 15. Guard J, Morales CA, Fedorka-Cray P, Gast RK. 2011. Single nucleotide polymorphisms  
478 that differentiate two subpopulations of *Salmonella enteritidis* within phage type. *BMC*  
479 *Res Notes* 4:369.
- 480 16. Rasko DA, Webster DR, Sahl JW, Bashir A, Boisen N, Scheutz F, Paxinos EE, Sebra R, Chin  
481 CS, Iliopoulos D, Klammer A, Peluso P, Lee L, Kislyuk AO, Bullard J, Kasarskis A, Wang S,  
482 Eid J, Rank D, Redman JC, Steyert SR, Frimodt-Moller J, Struve C, Petersen AM, Krogfelt  
483 KA, Nataro JP, Schadt EE, Waldor MK. 2011. Origins of the E. coli strain causing an  
484 outbreak of hemolytic-uremic syndrome in Germany. *N Engl J Med* 365:709-17.
- 485 17. Hendriksen RS, Price LB, Schupp JM, Gillece JD, Kaas RS, Engelthaler DM, Bortolaia V,  
486 Pearson T, Waters AE, Upadhyay BP, Shrestha SD, Adhikari S, Shakya G, Keim PS,  
487 Aarestrup FM. 2011. Population genetics of *Vibrio cholerae* from Nepal in 2010:  
488 evidence on the origin of the Haitian outbreak. *MBio* 2:e00157-11.
- 489 18. Harris SR, Cartwright EJ, Torok ME, Holden MT, Brown NM, Ogilvy-Stuart AL, Ellington  
490 MJ, Quail MA, Bentley SD, Parkhill J, Peacock SJ. 2013. Whole-genome sequencing for  
491 analysis of an outbreak of methicillin-resistant *Staphylococcus aureus*: a descriptive  
492 study. *Lancet Infect Dis* 13:130-6.
- 493 19. Allard MW, Strain E, Melka D, Bunning K, Musser SM, Brown EW, Timme R. 2016.  
494 Practical Value of Food Pathogen Traceability through Building a Whole-Genome  
495 Sequencing Network and Database. *J Clin Microbiol* 54:1975-83.
- 496 20. Bankevich A, Nurk S, Antipov D, Gurevich AA, Dvorkin M, Kulikov AS, Lesin VM,  
497 Nikolenko SI, Pham S, Prjibelski AD, Pyshkin AV, Sirotkin AV, Vyahhi N, Tesler G,

- 498 Alekseyev MA, Pevzner PA. 2012. SPAdes: a new genome assembly algorithm and its  
499 applications to single-cell sequencing. *J Comput Biol* 19:455-77.
- 500 21. Klimke W, Agarwala R, Badretdin A, Chetvernin S, Ciufo S, Fedorov B, Kiryutin B, O'Neill  
501 K, Resch W, Resenchuk S, Schafer S, Tolstoy I, Tatusova T. 2009. The National Center for  
502 Biotechnology Information's Protein Clusters Database. *Nucleic Acids Res* 37:D216-23.
- 503 22. Yao K, Muruvanda T, Roberts RJ, Payne J, Allard MW, Hoffmann M. 2016. Complete  
504 Genome and Methylome Sequences of *Salmonella enterica* subsp. *enterica* Serovar  
505 Panama (ATCC 7378) and *Salmonella enterica* subsp. *enterica* Serovar Sloterdijk (ATCC  
506 15791). *Genome Announc* 4.
- 507 23. Chin CS, Alexander DH, Marks P, Klammer AA, Drake J, Heiner C, Clum A, Copeland A,  
508 Huddleston J, Eichler EE, Turner SW, Korlach J. 2013. Nonhybrid, finished microbial  
509 genome assemblies from long-read SMRT sequencing data. *Nat Methods* 10:563-9.
- 510 24. Davis S PJ, Luo Y, Payne J, Shpuntoff A, Rand H, Strain E. 2015. CFSAN SNP Pipeline: an  
511 automated method for constructing SNP matrices from next-generation sequence data.  
512 *PeerJ Computer Science* 1:e20 <https://doi.org/10.7717/peerj-cs.20>.
- 513 25. Zwickl DJ. 2006. Genetic algorithm approaches for the phylogenetic analysis of large  
514 biological sequence datasets under the maximum likelihood criterion. PhD dissertation,  
515 The University of Texas at Austin.
- 516 26. Reumerman RA, Tucker NP, Herron PR, Hoskisson PA, Sangal V. 2013. Tool for rapid  
517 annotation of microbial SNPs (TRAMS): a simple program for rapid annotation of  
518 genomic variation in prokaryotes. *Antonie Van Leeuwenhoek* 104:431-4.
- 519 27. Kumar S, Stecher G, Tamura K. 2016. MEGA7: Molecular Evolutionary Genetics Analysis  
520 Version 7.0 for Bigger Datasets. *Mol Biol Evol* 33:1870-4.
- 521 28. Toro M, Retamal P, Ayers S, Barreto M, Allard M, Brown EW, Gonzalez-Escalona N. 2016.  
522 Whole-Genome Sequencing Analysis of *Salmonella enterica* Serovar Enteritidis Isolates  
523 in Chile Provides Insights into Possible Transmission between Gulls, Poultry, and  
524 Humans. *Appl Environ Microbiol* 82:6223-6232.
- 525 29. Bernard Greenberg JAK, Marc J. Klowden. 1970. Factors affecting the transmission of  
526 *Salmonella* by flies: natural resistance to colonization and bacterial interference.  
527 *Infection and Immunity* 2:800-809.
- 528 30. Tizard I. 2004. Salmonellosis in wild birds. *Journal of Exotic Pet Medicine* 13:50-66.
- 529 31. M.N. Skow JJM, C. Rahbek, J. Lodal, J.B. Jespersen, J.C.Jorgensen, H.H. Dietz, M. Chriel,  
530 D.L. Baggesen. 2008. Transmission of *Salmonella* between wildlife and meat-production  
531 animals in Denmark. *Journal of Applied Microbiology* 105:1558-1568.
- 532 32. F. Hillbert FJMS, R. Chopra-Dewasthaly, P. Paulsen. 2012. *Salmonella* in the wildlife-  
533 human interface. *Food Research International* 45:603-608.
- 534 33. B. W. Mitchell RJB, M. E. Berrang, J. S. Bailey, N. A. Cox. 2002. Reducing airborne  
535 pathogens, dust and *Salmonella* transmission in experimental hatching cabinets using an  
536 electrostatic space charge system. *Poultry Science* 81:49-55.
- 537 34. Carroll LM, Wiedmann M, den Bakker H, Siler J, Warchocki S, Kent D, Lyalina S, Davis M,  
538 Sicho W, Besser T, Warnick LD, Pereira RV. 2017. Whole-Genome Sequencing of Drug-  
539 Resistant *Salmonella enterica* Isolates from Dairy Cattle and Humans in New York and  
540 Washington States Reveals Source and Geographic Associations. *Appl Environ Microbiol*  
541 83.



- 542 35. McDermott PF, Tyson GH, Kabera C, Chen Y, Li C, Folster JP, Ayers SL, Lam C, Tate HP,  
543 Zhao S. 2016. Whole-Genome Sequencing for Detecting Antimicrobial Resistance in  
544 Nontyphoidal *Salmonella*. *Antimicrob Agents Chemother* 60:5515-20.
- 545 36. Tyson GH, McDermott PF, Li C, Chen Y, Tadesse DA, Mukherjee S, Bodeis-Jones S, Kabera  
546 C, Gaines SA, Loneragan GH, Edrington TS, Torrence M, Harhay DM, Zhao S. 2015. WGS  
547 accurately predicts antimicrobial resistance in *Escherichia coli*. *J Antimicrob Chemother*  
548 70:2763-9.
- 549 37. Gawryszewska I, Malinowska K, Kuch A, Chrobak-Chmiel D, Laniewska-Trokenheim L,  
550 Hryniewicz W, Sadowy E. 2017. Distribution of antimicrobial resistance determinants,  
551 virulence-associated factors and CRISPR loci in isolates of *Enterococcus faecalis* from  
552 various settings and genetic lineages. *Pathog Dis* doi:10.1093/femspd/ftx021.
- 553 38. Palmer KL, Gilmore MS. 2010. Multidrug-resistant enterococci lack CRISPR-cas. *MBio* 1.  
554 39. Price VJ, Huo W, Sharifi A, Palmer KL. 2016. CRISPR-cas and restriction-modification act  
555 additively against conjugative antibiotic resistance plasmid transfer in *Enterococcus*  
556 *faecalis*. *mSphere* 1.
- 557 40. Liu J, Guo JT, Li YG, Johnston RN, Liu GR, Liu SL. 2013. The type VI secretion system gene  
558 cluster of *Salmonella typhimurium*: required for full virulence in mice. *J Basic Microbiol*  
559 53:600-7.
- 560 41. Mulder DT, Cooper CA, Coombes BK. 2012. Type VI secretion system-associated gene  
561 clusters contribute to pathogenesis of *Salmonella enterica* serovar Typhimurium. *Infect*  
562 *Immun* 80:1996-2007.
- 563 42. Guo A, Cao S, Tu L, Chen P, Zhang C, Jia A, Yang W, Liu Z, Chen H, Schifferli DM. 2009.  
564 FimH alleles direct preferential binding of *Salmonella* to distinct mammalian cells or to  
565 avian cells. *Microbiology* 155:1623-33.
- 566 43. Jean Guard, Devendra Shah, Cesar Morales, Doug Call. 2011. Evolutionary trends  
567 associated with niche specialization as modeled by whole genome analysis of egg-  
568 contaminating *Salmonella enterica* serovar Enteritidis. *Salmonella: From Genome to*  
569 *Function*, Chapter 5; Editors: Steffen Porwollik:91-106.
- 570 44. Pan Z, Carter B, Nunez-Garcia J, Abuoun M, Fookes M, Ivens A, Woodward MJ, Anjum  
571 MF. 2009. Identification of genetic and phenotypic differences associated with prevalent  
572 and non-prevalent *Salmonella* Enteritidis phage types: analysis of variation in amino acid  
573 transport. *Microbiology* 155:3200-13.
- 574 45. Langridge GC, Fookes M, Connor TR, Feltwell T, Feasey N, Parsons BN, Seth-Smith HM,  
575 Barquist L, Stedman A, Humphrey T, Wigley P, Peters SE, Maskell DJ, Corander J,  
576 Chabalgoity JA, Barrow P, Parkhill J, Dougan G, Thomson NR. 2015. Patterns of genome  
577 evolution that have accompanied host adaptation in *Salmonella*. *Proc Natl Acad Sci U S*  
578 *A* 112:863-8.
- 579 46. Pulido-Landinez M, Sanchez-Ingunza R, Guard J, do Nascimento VP. 2014. Presence of  
580 *Salmonella enteritidis* and *Salmonella gallinarum* in commercial laying hens diagnosed  
581 with fowl typhoid disease in Colombia. *Avian Dis* 58:165-70.
- 582 47. Porwollik S, Santiviago CA, Cheng P, Florea L, Jackson S, McClelland M. 2005. Differences  
583 in gene content between *Salmonella enterica* serovar Enteritidis isolates and  
584 comparison to closely related serovars Gallinarum and Dublin. *J Bacteriol* 187:6545-55.

- 585 48. Porwollik S, Boyd EF, Choy C, Cheng P, Florea L, Proctor E, McClelland M. 2004.  
586 Characterization of *Salmonella enterica* subspecies I genovars by use of microarrays. J  
587 Bacteriol 186:5883-98.  
588

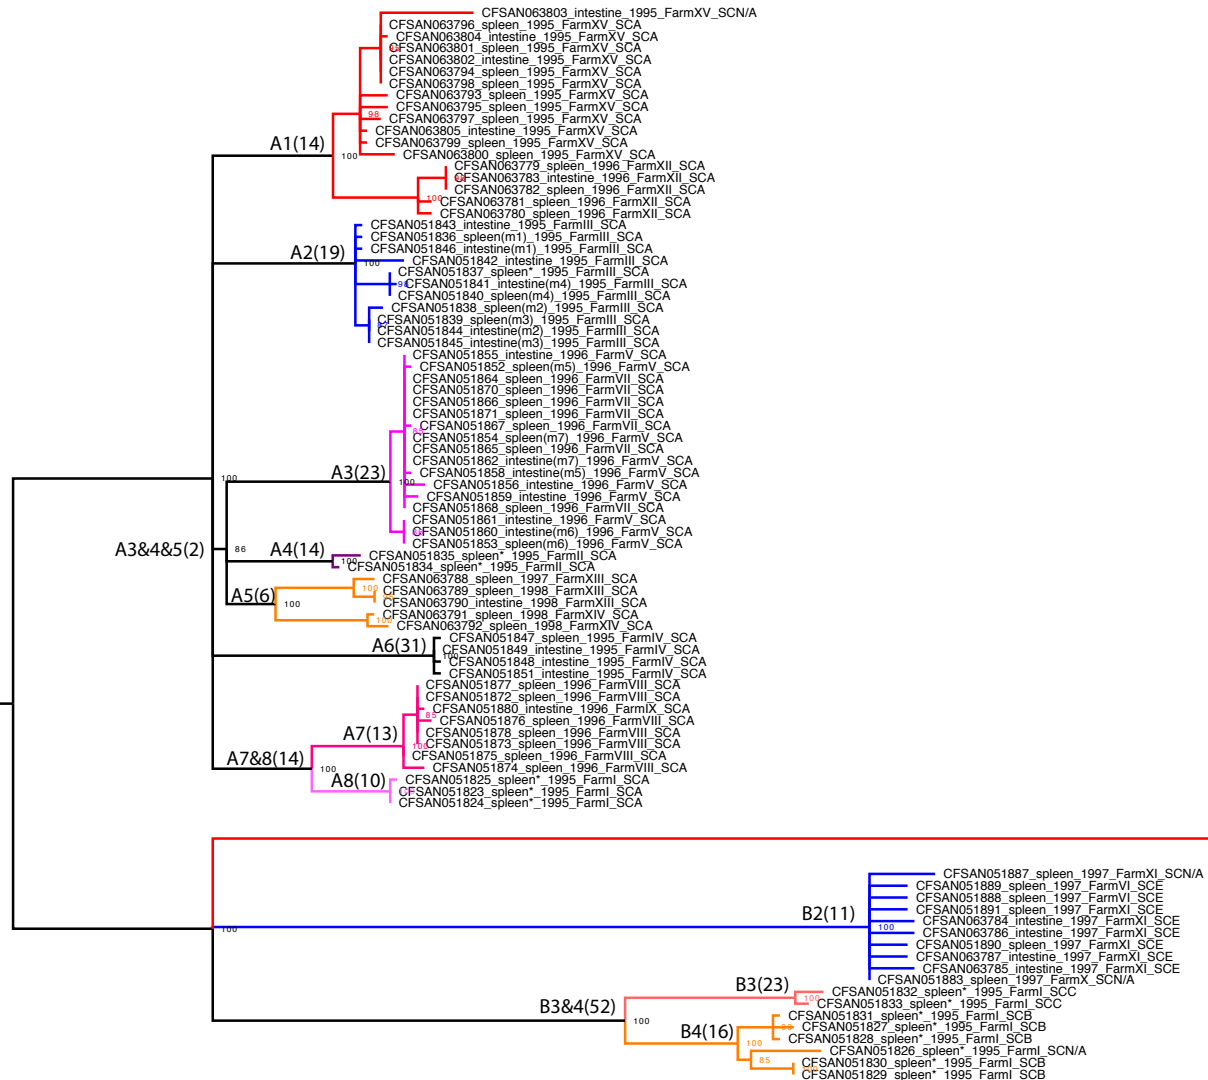

Figure 1. Maximum likelihood phylogenetic tree of 91 *S. Enteritidis* isolates from mice spleens and intestines. We constructed the phylogenetic tree using 742 single nucleotide polymorphisms (SNPs). All sequenced isolates were divided into two major clades, Clade A and B, which were further grouped into 12 subgroups.

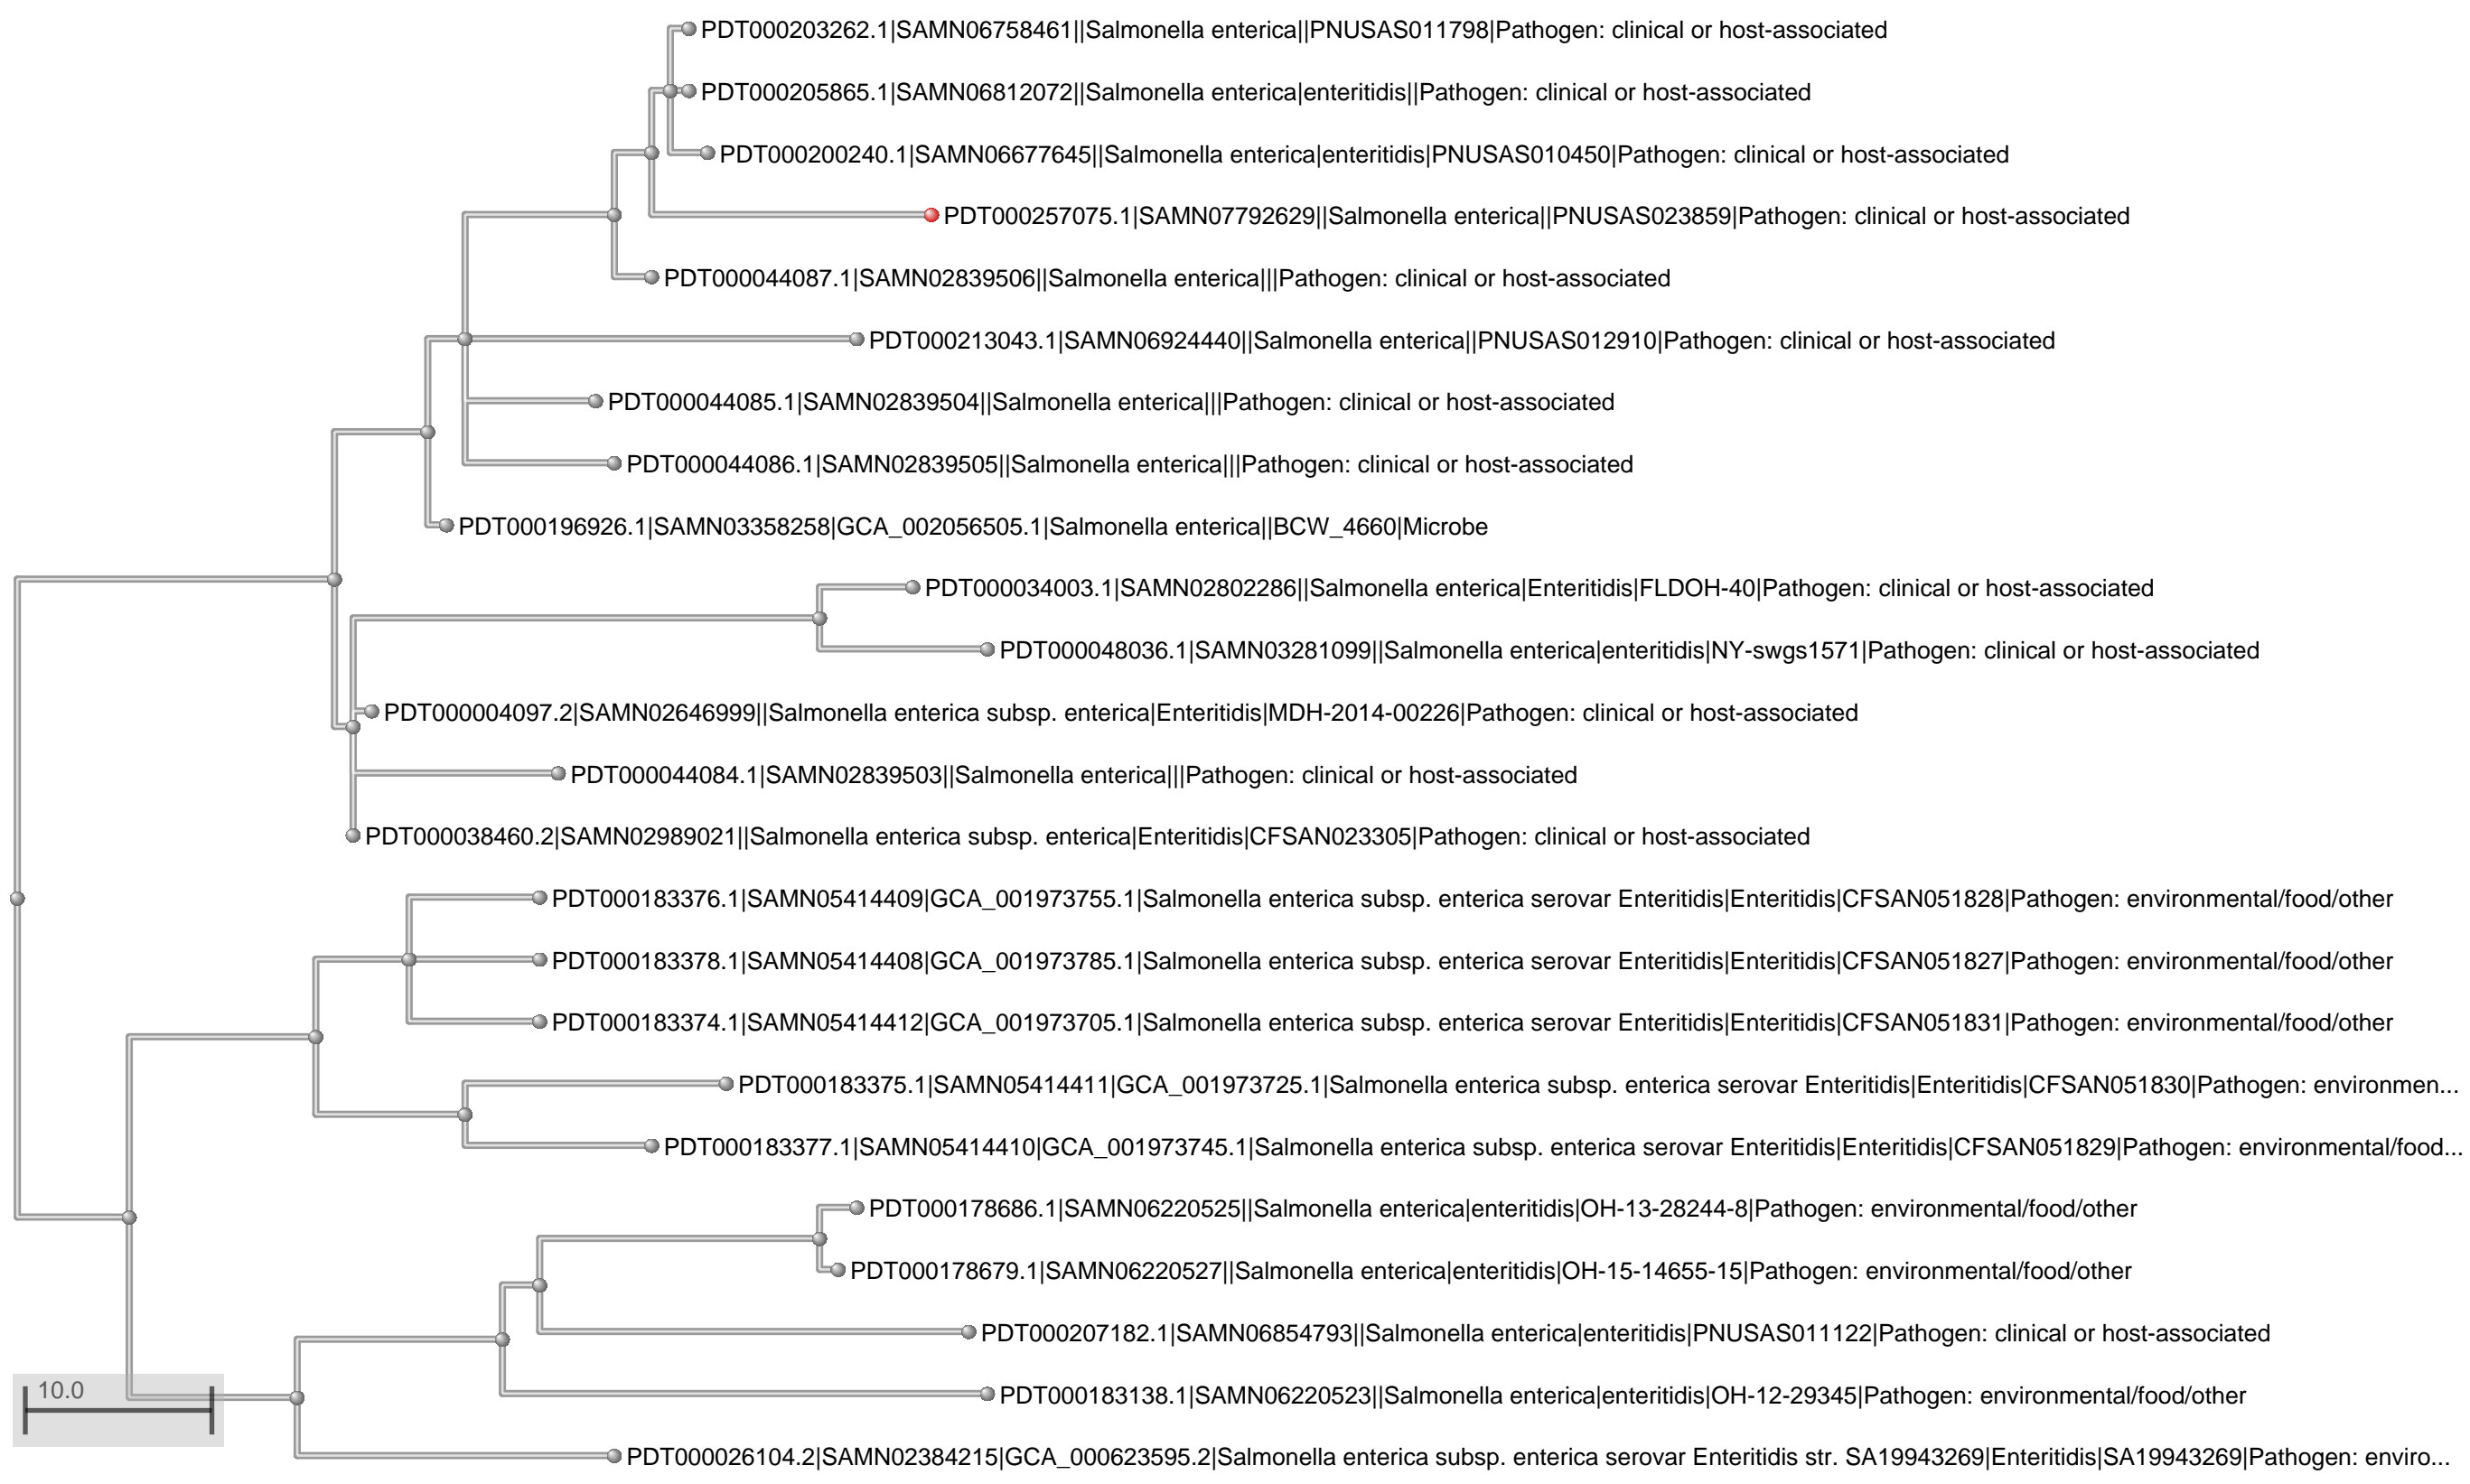

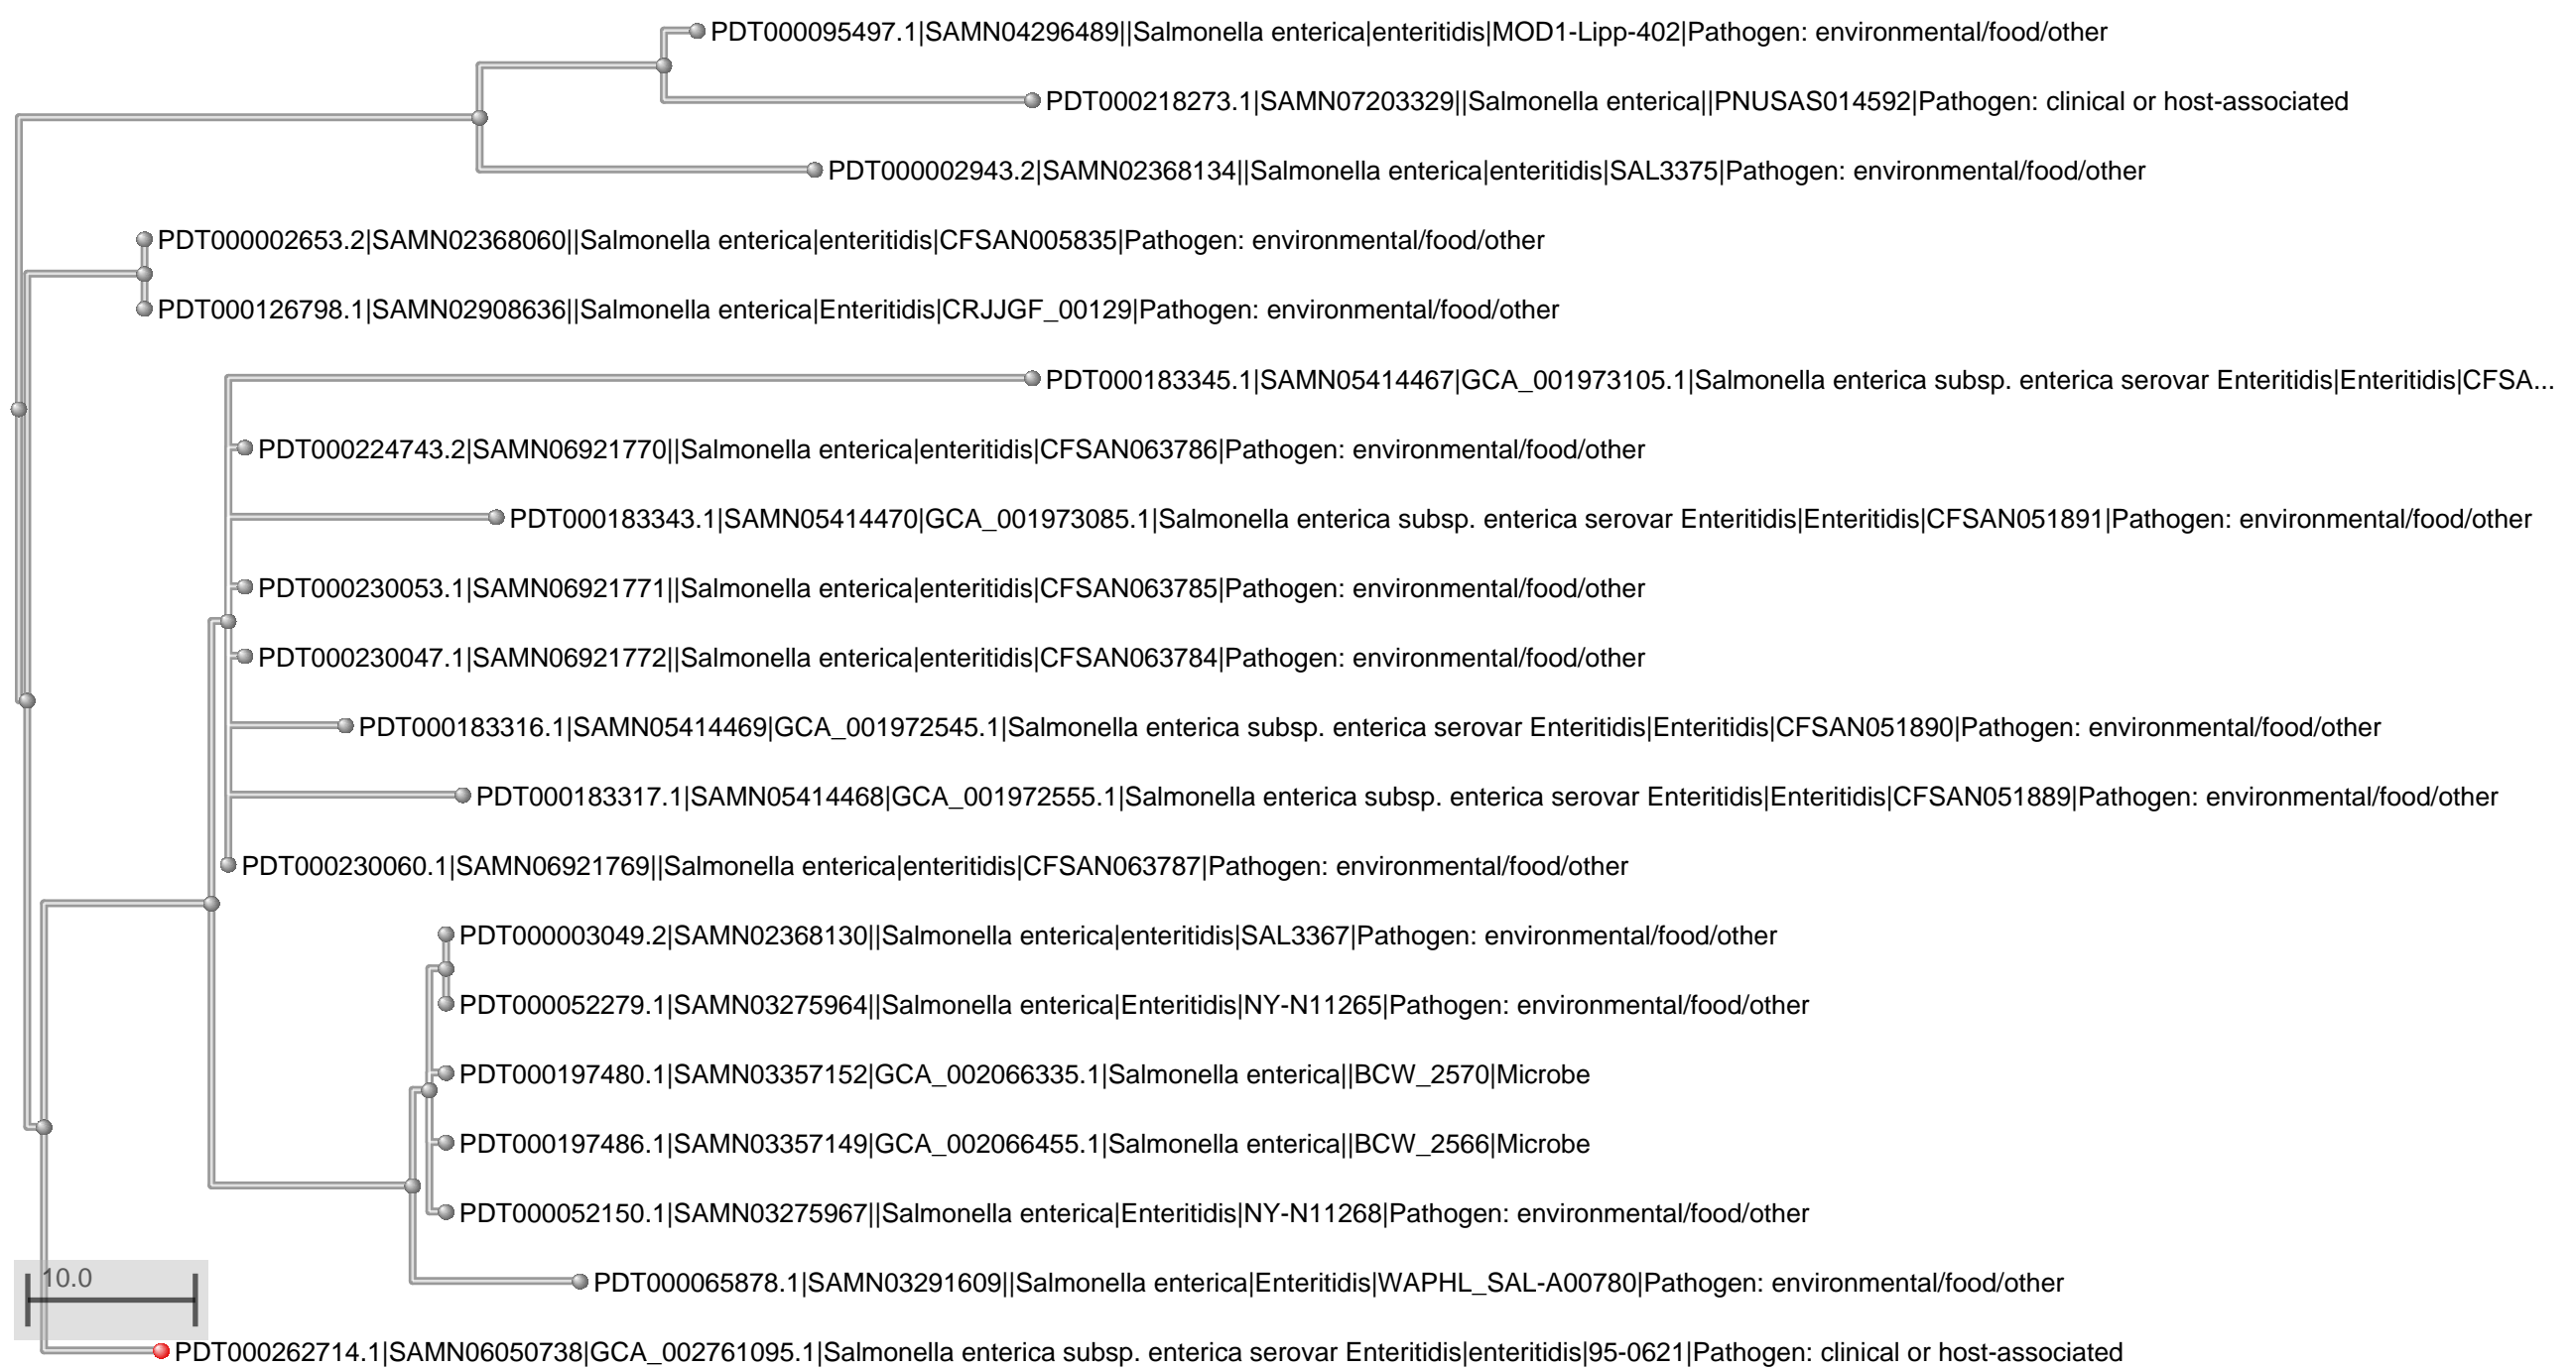

Table 1. The metadata and general genomic information of 91 sequenced *S. Enteritidis* in current study.

| Strain          | Year | Source    | Farm ID    | Clade | SNP Cluster | Contig# (>500bp) | AMR Gene | SRA Accession |
|-----------------|------|-----------|------------|-------|-------------|------------------|----------|---------------|
| CFSAN051823     | 1995 | Spleen*   | I (ST11)   | A8    | A           | 37               |          | SRR5063209    |
| CFSAN051824     | 1995 | Spleen*   | I (ST11)   | A8    | A           | 36               |          | SRR5063211    |
| CFSAN051825     | 1995 | Spleen*   | I (ST11)   | A8    | A           | 40               |          | SRR5063208    |
| CFSAN051826     | 1995 | Spleen*   | I (ST3632) | B4    | N/A         | 39               |          | SRR5063210    |
| CFSAN051827     | 1995 | Spleen*   | I (ST3632) | B4    | B           | 37               |          | SRR5063216    |
| CFSAN051828     | 1995 | Spleen*   | I (ST3632) | B4    | B           | 38               |          | SRR5064765    |
| CFSAN051829     | 1995 | Spleen*   | I (ST3632) | B4    | B           | 40               |          | SRR5064766    |
| CFSAN051830     | 1995 | Spleen*   | I (ST3632) | B4    | B           | 37               |          | SRR5064767    |
| CFSAN051831     | 1995 | Spleen*   | I (ST3632) | B4    | B           | 35               |          | SRR5064768    |
| CFSAN051832     | 1995 | Spleen*   | I (ST11)   | B3    | C           | 38               |          | SRR5064769    |
| CFSAN051833     | 1995 | Spleen*   | I (ST11)   | B3    | C           | 39               |          | SRR5064773    |
| CFSAN051834     | 1995 | Spleen*   | II (ST11)  | A4    | A           | 39               |          | SRR5064774    |
| CFSAN051835     | 1995 | Spleen*   | II (ST11)  | A4    | A           | 36               |          | SRR5064771    |
| CFSAN051836(m1) | 1995 | Spleen    | III (ST11) | A2    | A           | 39               |          | SRR5064772    |
| CFSAN051837     | 1995 | Spleen*   | III (ST11) | A2    | A           | 39               |          | SRR5064777    |
| CFSAN051838(m2) | 1995 | Spleen    | III (ST11) | A2    | A           | 38               |          | SRR5064775    |
| CFSAN051839(m3) | 1995 | Spleen    | III (ST11) | A2    | A           | 37               |          | SRR5064776    |
| CFSAN051840(m4) | 1995 | Spleen    | III (ST11) | A2    | A           | 40               |          | SRR5064779    |
| CFSAN051841(m4) | 1995 | Intestine | III (ST11) | A2    | A           | 39               |          | SRR5064781    |
| CFSAN051842     | 1995 | Intestine | III (ST11) | A2    | A           | 36               |          | SRR5064783    |
| CFSAN051843     | 1995 | Intestine | III (ST11) | A2    | A           | 41               |          | SRR5064782    |
| CFSAN051844(m2) | 1995 | Intestine | III (ST11) | A2    | A           | 42               |          | SRR5064786    |
| CFSAN051845(m3) | 1995 | Intestine | III (ST11) | A2    | A           | 40               |          | SRR5064785    |
| CFSAN051846(m1) | 1995 | Intestine | III (ST11) | A2    | A           | 44               |          | SRR5064787    |
| CFSAN051847     | 1995 | Spleen    | IV (ST11)  | A6    | A           | 37               |          | SRR5064784    |
| CFSAN051848     | 1995 | Intestine | IV (ST11)  | A6    | A           | 58               |          | SRR5064788    |
| CFSAN051849     | 1995 | Intestine | IV (ST11)  | A6    | A           | 41               |          | SRR5064792    |
| CFSAN051851     | 1995 | Intestine | IV (ST11)  | A6    | A           | 38               |          | SRR5064795    |

|                        |      |           |             |    |     |     |                                  |            |
|------------------------|------|-----------|-------------|----|-----|-----|----------------------------------|------------|
| <b>CFSAN051852(m5)</b> | 1996 | Spleen    | V (ST11)    | A3 | A   | 40  |                                  | SRR5064794 |
| <b>CFSAN051853(m6)</b> | 1996 | Spleen    | V (ST11)    | A3 | A   | 43  |                                  | SRR5064790 |
| <b>CFSAN051854(m7)</b> | 1996 | Spleen    | V (ST11)    | A3 | A   | 70  |                                  | SRR5064797 |
| <b>CFSAN051855</b>     | 1996 | Intestine | V (ST11)    | A3 | A   | 39  |                                  | SRR5064802 |
| <b>CFSAN051856</b>     | 1996 | Intestine | V (ST11)    | A3 | A   | 38  |                                  | SRR5064799 |
| <b>CFSAN051858(m5)</b> | 1996 | Intestine | V (ST11)    | A3 | A   | 44  |                                  | SRR5064800 |
| <b>CFSAN051859</b>     | 1996 | Intestine | V (ST11)    | A3 | A   | 45  |                                  | SRR5064803 |
| <b>CFSAN051860(m6)</b> | 1996 | Intestine | V (ST11)    | A3 | A   | 45  |                                  | SRR5064804 |
| <b>CFSAN051861</b>     | 1996 | Intestine | V (ST11)    | A3 | A   | 39  |                                  | SRR5064801 |
| <b>CFSAN051862(m7)</b> | 1996 | Intestine | V (ST11)    | A3 | A   | 39  |                                  | SRR5064806 |
| <b>CFSAN051864</b>     | 1996 | Spleen    | VII (ST11)  | A3 | A   | 39  |                                  | SRR5064810 |
| <b>CFSAN051865</b>     | 1996 | Spleen    | VII (ST11)  | A3 | A   | 40  |                                  | SRR5064809 |
| <b>CFSAN051866</b>     | 1996 | Spleen    | VII (ST11)  | A3 | A   | 41  |                                  | SRR5064812 |
| <b>CFSAN051867</b>     | 1996 | Spleen    | VII (ST11)  | A3 | A   | 40  |                                  | SRR5064811 |
| <b>CFSAN051868</b>     | 1996 | Spleen    | VII (ST11)  | A3 | A   | 37  |                                  | SRR5064813 |
| <b>CFSAN051870</b>     | 1996 | Spleen    | VII (ST11)  | A3 | A   | 39  |                                  | SRR5064814 |
| <b>CFSAN051871</b>     | 1996 | Spleen    | VII (ST11)  | A3 | A   | 49  |                                  | SRR5064817 |
| <b>CFSAN051872</b>     | 1996 | Spleen    | VIII (ST11) | A7 | A   | 99  |                                  | SRR5064815 |
| <b>CFSAN051873</b>     | 1996 | Spleen    | VIII (ST11) | A7 | A   | 35  |                                  | SRR5064816 |
| <b>CFSAN051874</b>     | 1996 | Spleen    | VIII (ST11) | A7 | A   | 39  |                                  | SRR5064818 |
| <b>CFSAN051875</b>     | 1996 | Spleen    | VIII (ST11) | A7 | A   | 39  |                                  | SRR5064821 |
| <b>CFSAN051876</b>     | 1996 | Spleen    | VIII (ST11) | A7 | A   | 39  |                                  | SRR5064820 |
| <b>CFSAN051877</b>     | 1996 | Spleen    | VIII (ST11) | A7 | A   | 40  |                                  | SRR5064854 |
| <b>CFSAN051878</b>     | 1996 | Spleen    | VIII (ST11) | A7 | A   | 115 |                                  | SRR5064855 |
| <b>CFSAN051880</b>     | 1996 | Intestine | IX (ST11)   | A7 | A   | 40  |                                  | SRR5064857 |
| <b>CFSAN051881(m8)</b> | 1997 | Intestine | X (ST11)    | B1 | D   | 43  |                                  | SRR5065189 |
| <b>CFSAN051882</b>     | 1997 | Intestine | X (ST11)    | B1 | D   | 39  |                                  | SRR5065192 |
| <b>CFSAN051883</b>     | 1997 | Spleen    | X (ST11)    | B2 | N/A | 46  | <i>bla<sub>TEM-1</sub>, tetA</i> | SRR5065190 |
| <b>CFSAN051884</b>     | 1997 | Spleen    | X (ST11)    | B1 | D   | 40  |                                  | SRR5065191 |
| <b>CFSAN051885</b>     | 1997 | Spleen    | X (ST11)    | B1 | D   | 40  |                                  | SRR5065194 |
| <b>CFSAN051886(m8)</b> | 1997 | Spleen    | X (ST11)    | B1 | N/A | 38  |                                  | SRR5065196 |
| <b>CFSAN051887</b>     | 1997 | Spleen    | XI (ST11)   | B2 | N/A | 40  | <i>bla<sub>TEM-1</sub></i>       | SRR5065195 |
| <b>CFSAN051888</b>     | 1997 | Spleen    | VI (ST11)   | B2 | E   | 42  | <i>bla<sub>TEM-1</sub>, tetA</i> | SRR5065193 |

|                    |      |           |             |    |     |    |                                           |            |
|--------------------|------|-----------|-------------|----|-----|----|-------------------------------------------|------------|
| <b>CFSAN051889</b> | 1997 | Spleen    | VI (ST11)   | B2 | E   | 53 | <i>bla</i> <sub>TEM-1</sub> , <i>tetA</i> | SRR5065198 |
| <b>CFSAN051890</b> | 1997 | Spleen    | XI (ST11)   | B2 | E   | 42 | <i>bla</i> <sub>TEM-1</sub> , <i>tetA</i> | SRR5065197 |
| <b>CFSAN051891</b> | 1997 | Spleen    | XI (ST11)   | B2 | E   | 41 | <i>bla</i> <sub>TEM-1</sub> , <i>tetA</i> | SRR5065199 |
| <b>CFSAN063779</b> | 1996 | Spleen    | XII (ST11)  | A1 | A   | 15 |                                           | SRR5884037 |
| <b>CFSAN063780</b> | 1996 | Spleen    | XII (ST11)  | A1 | A   | 15 |                                           | SRR5884036 |
| <b>CFSAN063781</b> | 1996 | Spleen    | XII (ST11)  | A1 | A   | 15 |                                           | SRR5970532 |
| <b>CFSAN063782</b> | 1996 | Spleen    | XII (ST11)  | A1 | A   | 14 |                                           | SRR5884033 |
| <b>CFSAN063783</b> | 1996 | Intestine | XII (ST11)  | A1 | A   | 14 |                                           | SRR5884041 |
| <b>CFSAN063784</b> | 1997 | Intestine | XI (ST11)   | B2 | E   | 32 | <i>bla</i> <sub>TEM-1</sub> , <i>tetA</i> | SRR5884042 |
| <b>CFSAN063785</b> | 1997 | Intestine | XI (ST11)   | B2 | E   | 28 | <i>bla</i> <sub>TEM-1</sub> , <i>tetA</i> | SRR5884050 |
| <b>CFSAN063786</b> | 1997 | Intestine | XI (ST11)   | B2 | E   | 28 | <i>bla</i> <sub>TEM-1</sub> , <i>tetA</i> | SRR5884043 |
| <b>CFSAN063787</b> | 1997 | Intestine | XI (ST11)   | B2 | E   | 29 | <i>bla</i> <sub>TEM-1</sub> , <i>tetA</i> | SRR5884057 |
| <b>CFSAN063788</b> | 1997 | Spleen    | XIII (ST11) | A5 | A   | 22 |                                           | SRR5819771 |
| <b>CFSAN063789</b> | 1998 | Spleen    | XIII (ST11) | A5 | A   | 18 |                                           | SRR5819768 |
| <b>CFSAN063790</b> | 1998 | Intestine | XIII (ST11) | A5 | A   | 78 |                                           | SRR5819773 |
| <b>CFSAN063791</b> | 1998 | Spleen    | XIV (ST11)  | A5 | A   | 18 |                                           | SRR5819769 |
| <b>CFSAN063792</b> | 1998 | Spleen    | XIV (ST11)  | A5 | A   | 20 |                                           | SRR5819774 |
| <b>CFSAN063793</b> | 1995 | Spleen    | XV (ST11)   | A1 | A   | 17 |                                           | SRR5819770 |
| <b>CFSAN063794</b> | 1995 | Spleen    | XV (ST11)   | A1 | A   | 14 |                                           | SRR5819775 |
| <b>CFSAN063795</b> | 1995 | Spleen    | XV (ST11)   | A1 | A   | 14 |                                           | SRR5819777 |
| <b>CFSAN063796</b> | 1995 | Spleen    | XV (ST11)   | A1 | A   | 15 |                                           | SRR5819776 |
| <b>CFSAN063797</b> | 1995 | Spleen    | XV (ST11)   | A1 | A   | 15 |                                           | SRR5819784 |
| <b>CFSAN063798</b> | 1995 | Spleen    | XV (ST11)   | A1 | A   | 18 |                                           | SRR5819788 |
| <b>CFSAN063799</b> | 1995 | Spleen    | XV (ST11)   | A1 | A   | 14 |                                           | SRR5819790 |
| <b>CFSAN063800</b> | 1995 | Spleen    | XV (ST11)   | A1 | A   | 15 |                                           | SRR5819779 |
| <b>CFSAN063801</b> | 1995 | Spleen    | XV (ST11)   | A1 | A   | 19 |                                           | SRR5819785 |
| <b>CFSAN063802</b> | 1995 | Intestine | XV (ST11)   | A1 | A   | 25 |                                           | SRR5819789 |
| <b>CFSAN063803</b> | 1995 | Intestine | XV (ST11)   | A1 | N/A | 30 |                                           | SRR5819781 |
| <b>CFSAN063804</b> | 1995 | Intestine | XV (ST11)   | A1 | A   | 47 |                                           | SRR5819782 |
| <b>CFSAN063805</b> | 1995 | Intestine | XV (ST11)   | A1 | A   | 25 |                                           | SRR5819778 |

Spleen\* Spleen cultured but intestine not cultured, unknown about intestine.



SNP Cluster Number  
A PDS000002757.323  
B PDS000004690.16  
C PDS000011158.1  
D PDS000011157.1  
E PDS000004693.11

Table 2. The number of SNP differences (standard deviation) between 12 subgroups.

|           | <b>A1</b> | <b>A2</b> | <b>A3</b> | <b>A4</b> | <b>A5</b> | <b>A6</b> | <b>A7</b> | <b>A8</b> | <b>B1</b> | <b>B2</b> | <b>B3</b> |
|-----------|-----------|-----------|-----------|-----------|-----------|-----------|-----------|-----------|-----------|-----------|-----------|
| <b>A2</b> | 44(5)     |           |           |           |           |           |           |           |           |           |           |
| <b>A3</b> | 50(6)     | 45(6)     |           |           |           |           |           |           |           |           |           |
| <b>A4</b> | 40(5)     | 36(5)     | 39(6)     |           |           |           |           |           |           |           |           |
| <b>A5</b> | 44(5)     | 40(5)     | 43(6)     | 32(5)     |           |           |           |           |           |           |           |
| <b>A6</b> | 54(6)     | 50(6)     | 55(7)     | 46(6)     | 50(6)     |           |           |           |           |           |           |
| <b>A7</b> | 51(6)     | 47(6)     | 52(6)     | 43(6)     | 47(6)     | 57(7)     |           |           |           |           |           |
| <b>A8</b> | 50(6)     | 45(6)     | 51(6)     | 41(6)     | 45(6)     | 55(7)     | 24(5)     |           |           |           |           |
| <b>B1</b> | 92(8)     | 90(8)     | 95(8)     | 86(8)     | 90(8)     | 99(8)     | 97(8)     | 95(8)     |           |           |           |
| <b>B2</b> | 84(8)     | 82(8)     | 87(8)     | 78(8)     | 82(8)     | 91(8)     | 89(8)     | 87(8)     | 33(5)     |           |           |
| <b>B3</b> | 137(9)    | 135(9)    | 140(10)   | 131(9)    | 135(9)    | 144(10)   | 142(10)   | 140(10)   | 86(8)     | 78(8)     |           |
| <b>B4</b> | 133(9)    | 131(9)    | 137(9)    | 127(9)    | 132(9)    | 141(10)   | 138(10)   | 137(9)    | 83(8)     | 75(7)     | 46(6)     |

Table 3 Variable genes observed that define subgroups in phylogenetic tree of *S. Enteritidis*

| Location                         | Accession     | Annotation | Locus_tag   | Gene        | Positions in coding | Nucleotide change | Amino acid change | Synonymous / Nonsynonymous | Strand | Product name                                                      |
|----------------------------------|---------------|------------|-------------|-------------|---------------------|-------------------|-------------------|----------------------------|--------|-------------------------------------------------------------------|
| <i>A1 (18 samples / 14 SNPs)</i> |               |            |             |             |                     |                   |                   |                            |        |                                                                   |
| 66674                            | NZ_CP022003.1 | coding     | BCA92_00310 |             | 2562                | TCG -> TCA        | S -> S            | S                          | +      | transcriptional regulator                                         |
| 292426                           | NZ_CP022003.1 | coding     | BCA92_01355 |             | 84                  | CGT -> TGT        | R -> C            | N                          | -      | methyl-accepting chemotaxis protein II                            |
| 484015                           | NZ_CP022003.1 | coding     | BCA92_02350 |             | 689                 | GAC -> GGC        | D -> G            | N                          | -      | 50S ribosomal protein L11 methyltransferase                       |
| 1081137                          | NZ_CP022003.1 | coding     | BCA92_05455 |             | 705                 | GCC -> GTC        | A -> V            | N                          | -      | ribonucleoside-diphosphate reductase subunit alpha                |
| 1327257                          | NZ_CP022003.1 | coding     | BCA92_06615 |             | 181                 | CTG -> TTG        | L -> L            | S                          | +      | IMP dehydrogenase                                                 |
| 1408128                          | NZ_CP022003.1 | coding     | BCA92_07015 |             | 323                 | CCT -> CTT        | P -> L            | N                          | -      | glucose-specific phosphotransferase enzyme IIA component          |
| 1648417                          | NZ_CP022003.1 | coding     | BCA92_08220 |             | 490                 | CTG -> CTA        | L -> L            | S                          | -      | hypothetical protein                                              |
| 1755377                          | NZ_CP022003.1 | coding     | BCA92_08715 | <i>wcaF</i> | 251                 | GCT -> GTT        | A -> V            | N                          | +      | colanic acid biosynthesis acetyltransferase WcaF                  |
| 2549901                          | NZ_CP022003.1 | intergenic |             |             |                     |                   |                   |                            |        |                                                                   |
| 2732526                          | NZ_CP022003.1 | intergenic |             |             |                     |                   |                   |                            |        |                                                                   |
| 2803507                          | NZ_CP022003.1 | coding     | BCA92_14555 |             | 512                 | GCC -> GAC        | A -> D            | N                          | +      | type VI secretion protein IcmF                                    |
| 2845163                          | NZ_CP022003.1 | coding     | BCA92_14790 | <i>hpaE</i> | 1001                | TGG -> TAG        | W -> *            | nonsense                   | -      | 5-carboxymethyl-2-hydroxyruconate semialdehyde dehydrogenase      |
| 3031053                          | NZ_CP022003.1 | coding     | BCA92_15710 |             | 399                 | GCG -> ACG        | A -> T            | N                          | -      | glutathione ABC transporter permease                              |
| 3837497                          | NZ_CP022003.1 | intergenic |             |             |                     |                   |                   |                            |        |                                                                   |
| <i>A2 (11 samples / 19 SNPs)</i> |               |            |             |             |                     |                   |                   |                            |        |                                                                   |
| 92535                            | NZ_CP022003.1 | coding     | BCA92_00440 |             | 33                  | CAG -> CAC        | Q -> H            | N                          | +      | alpha-xylosidase                                                  |
| 444373                           | NZ_CP022003.1 | coding     | BCA92_02080 |             | 96                  | CGC -> CGT        | R -> R            | S                          | +      | 30S ribosomal protein S19                                         |
| 584188                           | NZ_CP022003.1 | intergenic |             |             |                     |                   |                   |                            |        |                                                                   |
| 586670                           | NZ_CP022003.1 | coding     | BCA92_02880 | <i>pnp</i>  | 410                 | GCG -> GTG        | A -> V            | N                          | +      | polyribonucleotide nucleotidyltransferase                         |
| 635474                           | NZ_CP022003.1 | intergenic |             |             |                     |                   |                   |                            |        |                                                                   |
| 847071                           | NZ_CP022003.1 | coding     | BCA92_04270 |             | 138                 | CGC -> CGT        | R -> R            | S                          | +      | transcriptional regulator                                         |
| 901519                           | NZ_CP022003.1 | coding     | BCA92_04520 | <i>fucl</i> | 525                 | GAA -> AAA        | E -> K            | N                          | -      | L-fucose isomerase                                                |
| 1033097                          | NZ_CP022003.1 | coding     | BCA92_05185 |             | 376                 | CAG -> CAA        | Q -> Q            | S                          | -      | hydrogenase formation protein HypD                                |
| 1156296                          | NZ_CP022003.1 | coding     | BCA92_05925 |             | 193                 | CGA -> AGA        | R -> R            | S                          | +      | late control protein D                                            |
| 1384377                          | NZ_CP022003.1 | coding     | BCA92_06875 |             | 1098                | GCG -> GCT        | A -> A            | S                          | +      | alcohol dehydrogenase EutG                                        |
| 1724432                          | NZ_CP022003.1 | coding     | BCA92_08600 |             | 263                 | TGG -> TAG        | W -> *            | nonsense                   | -      | DNA-binding response regulator                                    |
| 2294640                          | NZ_CP022003.1 | coding     | BCA92_11725 |             | 124                 | GCC -> GCA        | A -> A            | S                          | -      | hydrogenase formation protein                                     |
| 2852680                          | NZ_CP022003.1 | coding     | BCA92_14830 |             | 1189                | GAT -> AAT        | D -> N            | N                          | +      | two-component sensor histidine kinase                             |
| 3172034                          | NZ_CP022003.1 | coding     | BCA92_16425 |             | 826                 | CGG -> TGG        | R -> W            | N                          | +      | two-component sensor histidine kinase                             |
| 3749568                          | NZ_CP022003.1 | coding     | BCA92_19265 |             | 307                 | TGG -> TGA        | W -> *            | nonsense                   | -      | LysR family transcriptional regulator                             |
| 3782361                          | NZ_CP022003.1 | coding     | BCA92_19405 | <i>leuC</i> | 181                 | ATG -> GTG        | M -> V            | N                          | +      | 3-isopropylmalate dehydratase large subunit                       |
| 3976348                          | NZ_CP022003.1 | coding     | BCA92_20320 |             | 1523                | CGT -> CCT        | R -> p            | N                          | -      | methyl-accepting chemotaxis protein II                            |
| 4629508                          | NZ_CP022003.1 | intergenic |             |             |                     |                   |                   |                            |        |                                                                   |
| 4645676                          | NZ_CP022003.1 | coding     | BCA92_23640 |             | 998                 | AAC -> AGC        | N -> S            | N                          | +      | tRNA uridine-5-carboxymethylaminomethyl(34) synthesis enzyme MnmG |
| <i>A3 (17 samples / 23 SNPs)</i> |               |            |             |             |                     |                   |                   |                            |        |                                                                   |
| 499284                           | NZ_CP022003.1 | coding     | BCA92_02430 |             | 1084                | CTG -> TTG        | L -> L            | S                          | +      | DUF3971 domain-containing protein                                 |
| 537836                           | NZ_CP022003.1 | coding     | BCA92_02620 |             | 323                 | CGC -> CAC        | R -> H            | N                          | -      | glutamate synthase small subunit                                  |
| 943216                           | NZ_CP022003.1 | intergenic |             |             |                     |                   |                   |                            |        |                                                                   |
| 983144                           | NZ_CP022003.1 | coding     | BCA92_04915 | <i>mutS</i> | 892                 | AAC -> AAT        | N -> N            | S                          | -      | DNA mismatch repair protein MutS                                  |
| 1175265                          | NZ_CP022003.1 | coding     | BCA92_05960 |             | 312                 | CTC -> TTC        | L -> F            | N                          | -      | SsrA-binding protein                                              |
| 1270601                          | NZ_CP022003.1 | coding     | BCA92_06430 |             | 87                  | CTG -> CTA        | L -> L            | S                          | +      | IscS subfamily cysteine desulfurase                               |
| 1407550                          | NZ_CP022003.1 | coding     | BCA92_07010 |             | 148                 | GAT -> TAT        | D -> Y            | N                          | +      | cytoplasmic protein                                               |
| 1532601                          | NZ_CP022003.1 | intergenic |             |             |                     |                   |                   |                            |        |                                                                   |
| 1991481                          | NZ_CP022003.1 | coding     | BCA92_10040 |             | 729                 | TTT -> CTT        | F -> L            | N                          | -      | 50S ribosomal protein L16 arginine hydroxylase                    |

|                                             |               |            |             |             |      |            |        |          |   |                                                                 |  |
|---------------------------------------------|---------------|------------|-------------|-------------|------|------------|--------|----------|---|-----------------------------------------------------------------|--|
| 2029562                                     | NZ_CP022003.1 | intergenic |             |             |      |            |        |          |   |                                                                 |  |
| 2407662                                     | NZ_CP022003.1 | intergenic |             |             |      |            |        |          |   |                                                                 |  |
| 2699062                                     | NZ_CP022003.1 | coding     | BCA92_13935 | <i>zwf</i>  | 794  | CAG -> CTG | Q -> L | N        | - | glucose-6-phosphate dehydrogenase                               |  |
| 2725497                                     | NZ_CP022003.1 | coding     | BCA92_14075 |             | 1134 | GTT -> TTT | V -> F | N        | - | glycoside hydrolase 105 family protein                          |  |
| 3155979                                     | NZ_CP022003.1 | intergenic |             |             |      |            |        |          |   |                                                                 |  |
| 3174194                                     | NZ_CP022003.1 | coding     | BCA92_16430 |             | 329  | GCG -> GAG | A -> E | N        | + | DNA-binding response regulator                                  |  |
| 3201347                                     | NZ_CP022003.1 | coding     | BCA92_16545 | <i>asnB</i> | 854  | CAG -> CTG | Q -> L | N        | + | asparagine synthase B                                           |  |
| 3211689                                     | NZ_CP022003.1 | coding     | BCA92_16625 |             | 429  | CTG -> CTA | L -> L | S        | + | glutamate/aspartate ABC transporter substrate-binding protein   |  |
| 3660045                                     | NZ_CP022003.1 | intergenic |             |             |      |            |        |          |   |                                                                 |  |
| 4138301                                     | NZ_CP022003.1 | coding     | BCA92_21210 |             | 1020 | CAG -> TAG | Q -> * | nonsense | - | GTPase HflX                                                     |  |
| 4159701                                     | NZ_CP022003.1 | coding     | BCA92_21310 |             | 175  | CGT -> TGT | R -> C | N        | + | succinate dehydrogenase/fumarate reductase iron-sulfur subunit  |  |
| 4290798                                     | NZ_CP022003.1 | intergenic |             |             |      |            |        |          |   |                                                                 |  |
| 4330100                                     | NZ_CP022003.1 | intergenic |             |             |      |            |        |          |   |                                                                 |  |
| 4403772                                     | NZ_CP022003.1 | coding     | BCA92_22425 | <i>gldA</i> | 1066 | GAC -> AAC | D -> N | N        | + | glycerol dehydrogenase                                          |  |
| <i>A3&amp;4&amp;5 (24 samples / 2 SNPs)</i> |               |            |             |             |      |            |        |          |   |                                                                 |  |
| 3378656                                     | NZ_CP022003.1 | pseudogene | BCA92_17470 | <i>ushA</i> | 491  | GTG -> GGG | V -> G | N        | - | bifunctional UDP-sugar hydrolase/5'-nucleotidase                |  |
| 4325151                                     | NZ_CP022003.1 | intergenic |             |             |      |            |        |          |   |                                                                 |  |
| <i>A4 (2 samples / 14 SNPs)</i>             |               |            |             |             |      |            |        |          |   |                                                                 |  |
| 272586                                      | NZ_CP022003.1 | coding     | BCA92_01265 |             | 1197 | GGC -> GGA | G -> G | S        | + | phosphoesterase PA-phosphatase                                  |  |
| 366931                                      | NZ_CP022003.1 | coding     | BCA92_01675 |             | 1925 | GCC -> GTC | A -> V | N        | + | 4-alpha-glucanotransferase                                      |  |
| 889829                                      | NZ_CP022003.1 | intergenic |             |             |      |            |        |          |   |                                                                 |  |
| 1371258                                     | NZ_CP022003.1 | coding     | BCA92_06810 | <i>tkt</i>  | 210  | TCT -> CCT | S -> P | N        | - | transketolase                                                   |  |
| 1447810                                     | NZ_CP022003.1 | intergenic |             |             |      |            |        |          |   |                                                                 |  |
| 1544666                                     | NZ_CP022003.1 | coding     | BCA92_07710 |             | 302  | CCA -> CTA | P -> L | N        | + | 2-succinyl-6-hydroxy-2, 4-cyclohexadiene-1-carboxylate synthase |  |
| 1995406                                     | NZ_CP022003.1 | coding     | BCA92_10055 |             | 1191 | GCC -> TCC | A -> S | N        | - | adenylosuccinate lyase                                          |  |
| 2438031                                     | NZ_CP022003.1 | intergenic |             |             |      |            |        |          |   |                                                                 |  |
| 2745105                                     | NZ_CP022003.1 | intergenic |             |             |      |            |        |          |   |                                                                 |  |
| 2797811                                     | NZ_CP022003.1 | coding     | BCA92_14515 |             | 234  | CGG -> TGG | R -> W | N        | - | hypothetical protein                                            |  |
| 2980813                                     | NZ_CP022003.1 | coding     | BCA92_15430 |             | 1526 | TTA -> TGA | L -> * | nonsense | - | ATP-dependent endonuclease                                      |  |
| 3172203                                     | NZ_CP022003.1 | coding     | BCA92_16425 |             | 995  | GCC -> GTC | A -> V | N        | + | two-component sensor histidine kinase                           |  |
| 3760541                                     | NZ_CP022003.1 | coding     | BCA92_19310 | <i>ddl</i>  | 819  | ATT -> GTT | I -> V | N        | - | D-alanine--D-alanine ligase                                     |  |
| 3791617                                     | NZ_CP022003.1 | coding     | BCA92_19450 |             | 530  | GAG -> GTG | E -> V | N        | - | arabinose operon regulatory protein                             |  |
| <i>A5 (5 samples / 6 SNPs)</i>              |               |            |             |             |      |            |        |          |   |                                                                 |  |
| 1143752                                     | NZ_CP022003.1 | coding     | BCA92_05850 |             | 94   | AGG -> AGT | R -> S | N        | - | hypothetical protein                                            |  |
| 1344925                                     | NZ_CP022003.1 | coding     | BCA92_06700 |             | 1216 | CTG -> CTA | L -> L | S        | - | beta-barrel assembly-enhancing protease                         |  |
| 1629966                                     | NZ_CP022003.1 | coding     | BCA92_08125 |             | 1203 | GCA -> ACA | A -> T | N        | - | microcin C ABC transporter ATP-binding protein YejF             |  |
| 3172160                                     | NZ_CP022003.1 | coding     | BCA92_16425 |             | 952  | ACC -> CCC | T -> P | N        | + | two-component sensor histidine kinase                           |  |
| 3471679                                     | NZ_CP022003.1 | coding     | BCA92_17940 |             | 67   | TTA -> TTG | L -> L | S        | - | tRNA guanosine(34) transglycosylase Tgt                         |  |
| 3775456                                     | NZ_CP022003.1 | coding     | BCA92_19375 |             | 256  | GGA -> GGT | G -> G | S        | - | acetolactate synthase small subunit                             |  |
| <i>A6 (4 samples / 31 SNPs)</i>             |               |            |             |             |      |            |        |          |   |                                                                 |  |
| 84482                                       | NZ_CP022003.1 | coding     | BCA92_00390 |             | 2709 | GCT -> ACT | A -> T | N        | - | intestinal colonization autotransporter adhesin Misl            |  |
| 534862                                      | NZ_CP022003.1 | coding     | BCA92_02610 |             | 28   | TCA -> TCG | S -> S | S        | - | cytosine permease                                               |  |
| 624925                                      | NZ_CP022003.1 | coding     | BCA92_03070 | <i>pf1B</i> | 1937 | CGC -> CAC | R -> H | N        | + | formate acetyltransferase                                       |  |
| 642429                                      | NZ_CP022003.1 | coding     | BCA92_03180 |             | 198  | TCG -> TCT | S -> S | S        | + | ribosomal RNA large subunit methyltransferase G                 |  |
| 681388                                      | NZ_CP022003.1 | coding     | BCA92_03360 |             | 595  | CTG -> CTA | L -> L | S        | - | hypothetical protein                                            |  |
| 764440                                      | NZ_CP022003.1 | coding     | BCA92_03790 |             | 159  | GAC -> GAT | D -> D | S        | + | hypothetical protein                                            |  |
| 774876                                      | NZ_CP022003.1 | coding     | BCA92_03855 |             | 79   | GGA -> GGG | G -> G | S        | - | 16S rRNA (uracil(1498)-N(3))-methyltransferase                  |  |
| 812123                                      | NZ_CP022003.1 | coding     | BCA92_04070 |             | 76   | ACG -> TCG | T -> S | N        | + | 2-octaprenyl-6-methoxyphenyl hydroxylase                        |  |
| 1172189                                     | NZ_CP022003.1 | coding     | BCA92_05955 |             | 9325 | GGT -> GGA | G -> G | S        | - | Ig-like domain repeat protein                                   |  |

|         |               |            |             |                  |            |        |          |   |                                                               |
|---------|---------------|------------|-------------|------------------|------------|--------|----------|---|---------------------------------------------------------------|
| 1210085 | NZ_CP022003.1 | coding     | BCA92_06140 | 870              | TTG -> CTG | L -> L | S        | - | protein acetyltransferase                                     |
| 1721423 | NZ_CP022003.1 | coding     | BCA92_08580 | 1563             | CTC -> ATC | L -> I | N        | - | hypothetical protein                                          |
| 1740362 | NZ_CP022003.1 | coding     | BCA92_08645 | 2453             | CAC -> AAC | H -> N | N        | - | diguanylate cyclase/phosphodiesterase                         |
| 2210643 | NZ_CP022003.1 | intergenic |             |                  |            |        |          |   |                                                               |
| 2356200 | NZ_CP022003.1 | coding     | BCA92_12000 | 492              | GTC -> ATC | V -> I | N        | - | colanic acid/biofilm transcriptional regulator                |
| 2464926 | NZ_CP022003.1 | coding     | BCA92_12610 | 165              | GCC -> GCA | A -> A | S        | + | oxidoreductase                                                |
| 2521018 | NZ_CP022003.1 | coding     | BCA92_12900 | <i>trpB</i> 1178 | GCG -> GAG | A -> E | N        | + | tryptophan synthase subunit beta                              |
| 2676025 | NZ_CP022003.1 | intergenic |             |                  |            |        |          |   |                                                               |
| 3109364 | NZ_CP022003.1 | coding     | BCA92_16080 | 766              | GTG -> TTG | V -> L | N        | + | molybdenum-dependent transcriptional regulator                |
| 3171711 | NZ_CP022003.1 | coding     | BCA92_16425 | 503              | GAT -> GCT | D -> A | N        | + | two-component sensor histidine kinase                         |
| 3211370 | NZ_CP022003.1 | coding     | BCA92_16625 | 110              | AGC -> AAC | S -> N | N        | + | glutamate/aspartate ABC transporter substrate-binding protein |
| 3289174 | NZ_CP022003.1 | coding     | BCA92_17010 | 656              | GGC -> GAC | G -> D | N        | + | iron-enterobactin transporter permease                        |
| 3353022 | NZ_CP022003.1 | coding     | BCA92_17345 | 587              | ATC -> ACC | I -> T | N        | - | 2-hydroxy-3-oxopropionate reductase                           |
| 3371497 | NZ_CP022003.1 | coding     | BCA92_17435 | 385              | CTC -> TTC | L -> F | N        | + | paraslipin                                                    |
| 3378738 | NZ_CP022003.1 | pseudogene | BCA92_17470 | <i>ushA</i> 573  | GAG -> TAG | E -> * | nonsense | - | bifunctional UDP-sugar hydrolase/5'-nucleotidase              |
| 3556348 | NZ_CP022003.1 | coding     | BCA92_18320 | 340              | CAG -> CAT | Q -> H | N        | - | LysR family transcriptional regulator                         |
| 3569685 | NZ_CP022003.1 | coding     | BCA92_18395 | <i>frsA</i> 701  | ACC -> ATC | T -> I | N        | - | esterase                                                      |
| 3692990 | NZ_CP022003.1 | coding     | BCA92_18995 | 109              | GTC -> ATC | V -> I | N        | + | RNA 2',3'-cyclic phosphodiesterase                            |
| 3819853 | NZ_CP022003.1 | coding     | BCA92_19590 | 5                | CAT -> CGT | H -> R | N        | - | MFS transporter                                               |
| 4252918 | NZ_CP022003.1 | coding     | BCA92_21725 | 10483            | GGT -> GGC | G -> G | S        | - | Ig-like domain repeat protein                                 |
| 4299506 | NZ_CP022003.1 | intergenic |             |                  |            |        |          |   |                                                               |
| 4471528 | NZ_CP022003.1 | coding     | BCA92_22755 | 278              | GGT -> GAT | G -> D | N        | + | rhamnulokinase                                                |

#### A7 (8 samples / 13 SNPs)

|         |               |        |             |                 |            |        |                  |   |                                                     |
|---------|---------------|--------|-------------|-----------------|------------|--------|------------------|---|-----------------------------------------------------|
| 212601  | NZ_CP022003.1 | coding | BCA92_01020 | 575             | AAC -> AAC | N -> N | Same as referenc | + | fimbrial assembly protein                           |
| 738389  | NZ_CP022003.1 | coding | BCA92_03650 | 695             | GGT -> GGT | G -> G | Same as referenc | + | amidohydrolase                                      |
| 900194  | NZ_CP022003.1 | coding | BCA92_04515 | 719             | GCG -> GCG | A -> A | Same as referenc | - | L-fuculokinase                                      |
| 1392314 | NZ_CP022003.1 | coding | BCA92_06920 | 89              | CAT -> CAT | H -> H | Same as referenc | - | hypothetical protein                                |
| 1662042 | NZ_CP022003.1 | coding | BCA92_08285 | 671             | GAC -> GAC | D -> D | Same as referenc | + | DNA-binding transcriptional regulator GalS          |
| 1710502 | NZ_CP022003.1 | coding | BCA92_08530 | 405             | CCT -> CCT | P -> P | Same as referenc | + | GntR family transcriptional regulator               |
| 2972241 | NZ_CP022003.1 | coding | BCA92_15395 | 410             | GGC -> GGC | G -> G | Same as referenc | - | ATP-dependent Clp protease ATP-binding subunit ClpA |
| 3059259 | NZ_CP022003.1 | coding | BCA92_15835 | 1               | GTG -> GTG | V -> V | Same as referenc | + | mechanosensitive channel protein                    |
| 3292066 | NZ_CP022003.1 | coding | BCA92_17025 | <i>entF</i> 329 | GGC -> GGC | G -> G | Same as referenc | - | non-ribosomal peptide synthetase                    |
| 3302049 | NZ_CP022003.1 | coding | BCA92_17060 | 323             | GCT -> GCT | A -> A | Same as referenc | - | DNA-binding transcriptional regulator RamA          |
| 3400882 | NZ_CP022003.1 | coding | BCA92_17570 | 926             | CTA -> CTA | L -> L | Same as referenc | + | efflux transporter periplasmic adaptor subunit      |
| 3622599 | NZ_CP022003.1 | coding | BCA92_18690 | 75              | GAC -> GAC | D -> D | Same as referenc | + | Rcs stress response system protein RcsF             |
| 3917407 | NZ_CP022003.1 | coding | BCA92_20020 | 196             | CCC -> CCC | P -> P | Same as referenc | + | fimbrial protein SthA                               |

#### A7&8 (11 samples / 15SNPs)

|         |               |            |             |                 |            |        |                  |   |                                                  |
|---------|---------------|------------|-------------|-----------------|------------|--------|------------------|---|--------------------------------------------------|
| 47216   | NZ_CP022003.1 | coding     | BCA92_00220 | 182             | TCC -> TCC | S -> S | Same as referenc | - | hypothetical protein                             |
| 47216   | NZ_CP022003.1 | coding     | BCA92_00225 | 4               | GAC -> GAC | D -> D | Same as referenc | + | ilvB operon leader peptide IvbL                  |
| 742751  | NZ_CP022003.1 | intergenic |             |                 |            |        |                  |   |                                                  |
| 1061287 | NZ_CP022003.1 | coding     | BCA92_05350 | 85              | TTG -> TTG | L -> L | Same as referenc | + | alanine--tRNA ligase                             |
| 1593242 | NZ_CP022003.1 | intergenic |             |                 |            |        |                  |   |                                                  |
| 2589729 | NZ_CP022003.1 | coding     | BCA92_13275 | <i>cydB</i> 580 | AGC -> AGC | S -> S | Same as referenc | + | cytochrome d ubiquinol oxidase subunit II        |
| 2597837 | NZ_CP022003.1 | coding     | BCA92_13315 | 828             | TGT -> TGT | C -> C | Same as referenc | + | K+/H+ antiporter                                 |
| 2832926 | NZ_CP022003.1 | coding     | BCA92_14720 | 244             | TAT -> TAT | Y -> Y | Same as referenc | - | protein-disulfide reductase                      |
| 3064961 | NZ_CP022003.1 | coding     | BCA92_15860 | <i>dinG</i> 388 | AGA -> AGA | R -> R | Same as referenc | - | ATP-dependent DNA helicase DinG                  |
| 3124704 | NZ_CP022003.1 | coding     | BCA92_16160 | 699             | GTA -> GTA | V -> V | Same as referenc | - | cation transporter                               |
| 3325008 | NZ_CP022003.1 | coding     | BCA92_17205 | 198             | GCC -> GCC | A -> A | Same as referenc | - | outer membrane usher protein                     |
| 3378960 | NZ_CP022003.1 | pseudogene | BCA92_17470 | <i>ushA</i> 795 | TAG -> TAG | *      | Same as referenc | - | bifunctional UDP-sugar hydrolase/5'-nucleotidase |
| 3496206 | NZ_CP022003.1 | coding     | BCA92_18055 | 14              | CCC -> CCC | P -> P | Same as referenc | - | anti-RssB factor                                 |
| 3917922 | NZ_CP022003.1 | coding     | BCA92_20025 | 95              | GGC -> GGC | G -> G | Same as referenc | + | fimbrial assembly protein                        |



|         |               |            |             |             |            |            |          |     |                                                                      |                                                                                                   |
|---------|---------------|------------|-------------|-------------|------------|------------|----------|-----|----------------------------------------------------------------------|---------------------------------------------------------------------------------------------------|
| 1132290 | NZ_CP022003.1 | coding     | BCA92_05765 | 193         | TGC -> CGC | C -> R     | N        | +   | DinI family protein                                                  |                                                                                                   |
| 1153814 | NZ_CP022003.1 | coding     | BCA92_05915 | 997         | TGC -> GGC | C -> G     | N        | +   | phage tail tape measure protein                                      |                                                                                                   |
| 1165234 | NZ_CP022003.1 | coding     | BCA92_05955 | 2370        | ATC -> CTC | I -> L     | N        | -   | Ig-like domain repeat protein                                        |                                                                                                   |
| 1167383 | NZ_CP022003.1 | coding     | BCA92_05955 | 4519        | TGG -> TGT | W -> C     | N        | -   | Ig-like domain repeat protein                                        |                                                                                                   |
| 1186125 | NZ_CP022003.1 | coding     | BCA92_06035 | <i>trmD</i> | 294        | GGC -> GGA | G -> G   | S   | +                                                                    | tRNA (guanosine(37)-N1)-methyltransferase TrmD                                                    |
| 1189044 | NZ_CP022003.1 | intergenic |             |             |            |            |          |     |                                                                      |                                                                                                   |
| 1189098 | NZ_CP022003.1 | intergenic |             |             |            |            |          |     |                                                                      |                                                                                                   |
| 1221880 | NZ_CP022003.1 | coding     | BCA92_06205 | <i>rpoE</i> | 128        | TCG -> TTG | S -> L   | N   | +                                                                    | ECF RNA polymerase sigma-E factor                                                                 |
| 1255004 | NZ_CP022003.1 | intergenic |             |             |            |            |          |     |                                                                      |                                                                                                   |
| 1263328 | NZ_CP022003.1 | coding     | BCA92_06390 | 384         | TTT -> TTG | F -> L     | N        | +   | nickel transporter                                                   |                                                                                                   |
| 1289858 | NZ_CP022003.1 | coding     | BCA92_06505 | 1912        | TCG -> GCG | S -> A     | N        | +   | dimethyl sulfoxide reductase subunit A                               |                                                                                                   |
| 1365643 | NZ_CP022003.1 | coding     | BCA92_06785 | 671         | GCG -> GTG | A -> V     | N        | +   | oxidoreductase FeS-binding subunit                                   |                                                                                                   |
| 1380936 | NZ_CP022003.1 | coding     | BCA92_06860 | 211         | CAT -> TAT | H -> Y     | N        | +   | ethanolamine utilization protein EutN                                |                                                                                                   |
| 1387797 | NZ_CP022003.1 | coding     | BCA92_06890 | 573         | GGC -> GGA | G -> G     | S        | +   | ethanolamine ammonia-lyase heavy chain                               |                                                                                                   |
| 1397007 | NZ_CP022003.1 | coding     | BCA92_06950 | 855         | GGA -> GGC | G -> G     | S        | +   | iron-dependent peroxidase                                            |                                                                                                   |
| 1477635 | NZ_CP022003.1 | intergenic |             |             |            |            |          |     |                                                                      |                                                                                                   |
| 1485223 | NZ_CP022003.1 | coding     | BCA92_07425 | 1107        | TCC -> TCT | S -> S     | S        | +   | amidophosphoribosyltransferase                                       |                                                                                                   |
| 1524616 | NZ_CP022003.1 | coding     | BCA92_07630 | 621         | TCC -> TCT | S -> S     | S        | +   | NADH-quinone oxidoreductase subunit F                                |                                                                                                   |
| 1564854 | NZ_CP022003.1 | coding     | BCA92_07815 | 632         | ACA -> ATA | T -> I     | N        | -   | type III secretion system effector deubiquitinase SseL               |                                                                                                   |
| 1612441 | NZ_CP022003.1 | coding     | BCA92_08025 | 936         | CGT -> CGC | R -> R     | S        | +   | cytochrome c biogenesis protein CcmH                                 |                                                                                                   |
| 1646199 | NZ_CP022003.1 | coding     | BCA92_08210 | 961         | ACC -> GCC | T -> A     | N        | +   | PTS fructose transporter subunit EHBC                                |                                                                                                   |
| 1660947 | NZ_CP022003.1 | coding     | BCA92_08280 | 868         | CCG -> TCG | P -> S     | N        | +   | DUF418 family protein                                                |                                                                                                   |
| 1697466 | NZ_CP022003.1 | coding     | BCA92_08465 | 130         | TTT -> TTC | F -> F     | S        | -   | lipoprotein                                                          |                                                                                                   |
| 1722080 | NZ_CP022003.1 | coding     | BCA92_08585 | 98          | GGA -> GAA | G -> E     | N        | -   | hypothetical protein                                                 |                                                                                                   |
| 1753620 | NZ_CP022003.1 | coding     | BCA92_08705 | <i>wcaD</i> | 483        | AAC -> AAT | N -> N   | S   | +                                                                    | putative colanic acid polymerase WcaD                                                             |
| 1771599 | NZ_CP022003.1 | coding     | BCA92_08780 | <i>rfbB</i> | 781        | AAC -> CAC | N -> H   | N   | +                                                                    | dTDP-glucose 4,6-dehydratase                                                                      |
| 1771638 | NZ_CP022003.1 | coding     | BCA92_08780 | <i>rfbB</i> | 820        | TGT -> AGT | C -> S   | N   | +                                                                    | dTDP-glucose 4,6-dehydratase                                                                      |
| 1781330 | NZ_CP022003.1 | coding     | BCA92_08830 | 898         | AGA -> GGA | R -> G     | N        | +   | transporter                                                          |                                                                                                   |
| 1795919 | NZ_CP022003.1 | coding     | BCA92_08895 | <i>hisA</i> | 703        | ACC -> ACT | T -> T   | S   | -                                                                    | 1-(5-phosphoribosyl)-5-[(5-phosphoribosylamino)methylideneamino]imidazole-4-carboxamide isomerase |
| 1809044 | NZ_CP022003.1 | coding     | BCA92_08950 | 2335        | TCA -> TCG | S -> S     | S        | -   | E3 ubiquitin--protein ligase                                         |                                                                                                   |
| 1809044 | NZ_CP022003.1 | coding     | BCA92_08955 | 57          | CCT -> CCC | P -> P     | S        | +   | hypothetical protein                                                 |                                                                                                   |
| 1811339 | NZ_CP022003.1 | coding     | BCA92_08965 | 1662        | GAA -> GAG | E -> E     | S        | +   | thiosulfate reductase                                                |                                                                                                   |
| 1813310 | NZ_CP022003.1 | intergenic |             |             |            |            |          |     |                                                                      |                                                                                                   |
| 1822810 | NZ_CP022003.1 | coding     | BCA92_09030 | 923         | GAC -> GCC | D -> A     | N        | -   | propanediol utilization protein                                      |                                                                                                   |
| 1854608 | NZ_CP022003.1 | tRNA       | BCA92_09220 | 53          | N/A        | N/A        | N/A      | N/A | tRNA-Asn                                                             |                                                                                                   |
| 1891422 | NZ_CP022003.1 | coding     | BCA92_09450 | 25          | CCG -> CCA | P -> P     | S        | -   | recombinase                                                          |                                                                                                   |
| 1905319 | NZ_CP022003.1 | intergenic |             |             |            |            |          |     |                                                                      |                                                                                                   |
| 1923249 | NZ_CP022003.1 | intergenic |             |             |            |            |          |     |                                                                      |                                                                                                   |
| 1925726 | NZ_CP022003.1 | coding     | BCA92_09700 | <i>grxB</i> | 636        | GTT -> ATT | V -> I   | S   | -                                                                    | glutaredoxin 2                                                                                    |
| 1979211 | NZ_CP022003.1 | coding     | BCA92_09980 | 612         | CAT -> CAC | H -> H     | N        | +   | lipoprotein-releasing system ATP-binding protein LolD                |                                                                                                   |
| 2005269 | NZ_CP022003.1 | intergenic |             |             |            |            |          |     |                                                                      |                                                                                                   |
| 2010154 | NZ_CP022003.1 | intergenic |             |             |            |            |          |     |                                                                      |                                                                                                   |
| 2011688 | NZ_CP022003.1 | coding     | BCA92_10165 | 636         | GGC -> GGT | G -> G     | S        | +   | hypothetical protein                                                 |                                                                                                   |
| 2084889 | NZ_CP022003.1 | coding     | BCA92_10605 | 718         | TGG -> TGA | W -> *     | nonsense | -   | L-cystine transporter                                                |                                                                                                   |
| 2111961 | NZ_CP022003.1 | coding     | BCA92_10755 | 108         | ACT -> ACC | T -> T     | S        | +   | phosphoenolpyruvate synthase                                         |                                                                                                   |
| 2127652 | NZ_CP022003.1 | coding     | BCA92_10815 | 469         | ATC -> ATA | I -> I     | S        | -   | MFS transporter                                                      |                                                                                                   |
| 2174741 | NZ_CP022003.1 | coding     | BCA92_11065 | 267         | CCA -> CCG | P -> P     | S        | +   | EscJ/YscJ/HrcJ family type III secretion inner membrane ring protein |                                                                                                   |
| 2190356 | NZ_CP022003.1 | coding     | BCA92_11160 | 486         | AGC -> GGC | S -> G     | N        | -   | Bcr/CfiA family drug resistance efflux transporter                   |                                                                                                   |
| 2198111 | NZ_CP022003.1 | coding     | BCA92_11210 | 987         | CCT -> TCT | P -> S     | N        | -   | alkene reductase                                                     |                                                                                                   |
| 2216104 | NZ_CP022003.1 | coding     | BCA92_11315 | 337         | GCC -> GCT | A -> A     | S        | -   | electron transport complex subunit R <sub>sxC</sub>                  |                                                                                                   |
| 2216131 | NZ_CP022003.1 | coding     | BCA92_11315 | 364         | GAT -> GAC | D -> D     | S        | -   | electron transport complex subunit R <sub>sxC</sub>                  |                                                                                                   |
| 2216191 | NZ_CP022003.1 | coding     | BCA92_11315 | 424         | GCT -> GCC | A -> A     | S        | -   | electron transport complex subunit R <sub>sxC</sub>                  |                                                                                                   |

|         |               |            |             |                  |            |        |          |     |                                                             |
|---------|---------------|------------|-------------|------------------|------------|--------|----------|-----|-------------------------------------------------------------|
| 2232095 | NZ_CP022003.1 | coding     | BCA92_11390 | 182              | TGG -> TAG | W -> * | nonsense | -   | amidohydrolase                                              |
| 2254370 | NZ_CP022003.1 | coding     | BCA92_11505 | 584              | CGC -> CTC | R -> L | N        | -   | choline ABC transporter permease                            |
| 2256726 | NZ_CP022003.1 | coding     | BCA92_11520 | 337              | GAT -> GAG | D -> E | N        | -   | DMSO reductase maturation protein DsmD                      |
| 2274959 | NZ_CP022003.1 | coding     | BCA92_11605 | 1157             | GGC -> GAC | G -> D | N        | +   | dipeptidyl carboxypeptidase II                              |
| 2333624 | NZ_CP022003.1 | coding     | BCA92_11905 | 233              | TAC -> TGC | Y -> C | N        | +   | EamA family transporter                                     |
| 2337952 | NZ_CP022003.1 | intergenic |             |                  |            |        |          |     |                                                             |
| 2371331 | NZ_CP022003.1 | intergenic |             |                  |            |        |          |     |                                                             |
| 2380433 | NZ_CP022003.1 | coding     | BCA92_12115 | 749              | GTG -> GCG | V -> A | N        | +   | hypothetical protein                                        |
| 2438493 | NZ_CP022003.1 | coding     | BCA92_12425 | 327              | ACA -> ACG | T -> T | S        | +   | hypothetical protein                                        |
| 2467879 | NZ_CP022003.1 | coding     | BCA92_12625 | 145              | GAT -> AAT | D -> N | N        | +   | aromatic alcohol reductase                                  |
| 2496756 | NZ_CP022003.1 | coding     | BCA92_12775 | 72               | TGC -> TGT | C -> C | S        | +   | osmotically-inducible lipoprotein B                         |
| 2529496 | NZ_CP022003.1 | intergenic |             |                  |            |        |          |     |                                                             |
| 2549474 | NZ_CP022003.1 | ncRNA      | BCA92_13060 | 134              | N/A        | N/A    | N/A      | N/A | N/A                                                         |
| 2581346 | NZ_CP022003.1 | intergenic |             |                  |            |        |          |     |                                                             |
| 2593804 | NZ_CP022003.1 | coding     | BCA92_13290 | <i>treA</i> 1534 | ACC -> GCC | T -> A | N        | +   | trehalase                                                   |
| 2595691 | NZ_CP022003.1 | coding     | BCA92_13305 | <i>emtA</i> 475  | GCC -> GCA | A -> A | S        | -   | murein transglycosylase                                     |
| 2625180 | NZ_CP022003.1 | coding     | BCA92_13455 | 1476             | GTC -> ATC | V -> I | N        | -   | TerC family protein                                         |
| 2631795 | NZ_CP022003.1 | coding     | BCA92_13500 | 1009             | ATC -> ATT | I -> I | S        | -   | cell division protein FtsI                                  |
| 2633083 | NZ_CP022003.1 | coding     | BCA92_13510 | 110              | AAA -> AGA | K -> R | N        | -   | DUF2627 domain-containing protein                           |
| 2636289 | NZ_CP022003.1 | coding     | BCA92_13535 | 447              | GTC -> GTA | V -> V | S        | +   | MFS transporter                                             |
| 2663553 | NZ_CP022003.1 | coding     | BCA92_13695 | 290              | GGC -> GAC | G -> D | N        | -   | DNA breaking-rejoining protein                              |
| 2664866 | NZ_CP022003.1 | coding     | BCA92_13710 | 380              | GTC -> GAC | V -> D | N        | -   | DUF2514 domain-containing protein                           |
| 2696527 | NZ_CP022003.1 | coding     | BCA92_13930 | <i>edd</i> 305   | AAA -> AGA | K -> R | N        | -   | phosphogluconate dehydratase                                |
| 2737304 | NZ_CP022003.1 | coding     | BCA92_14130 | <i>motB</i> 187  | CTG -> CTA | L -> L | S        | -   | flagellar motor protein MotB                                |
| 2748251 | NZ_CP022003.1 | intergenic |             |                  |            |        |          |     |                                                             |
| 2749728 | NZ_CP022003.1 | coding     | BCA92_14210 | 123              | TGG -> GGG | W -> G | N        | -   | YecA family protein                                         |
| 2753476 | NZ_CP022003.1 | intergenic |             |                  |            |        |          |     |                                                             |
| 2786139 | NZ_CP022003.1 | intergenic |             |                  |            |        |          |     |                                                             |
| 2817536 | NZ_CP022003.1 | coding     | BCA92_14635 | 360              | TGC -> TGA | C -> * | nonsense | +   | acetylneuraminate ABC transporter                           |
| 2877805 | NZ_CP022003.1 | coding     | BCA92_14980 | 59               | GCA -> GTA | A -> V | N        | -   | hypothetical protein                                        |
| 2893251 | NZ_CP022003.1 | coding     | BCA92_15040 | 326              | GAA -> GCA | E -> A | N        | +   | DUF159 family protein                                       |
| 2975968 | NZ_CP022003.1 | coding     | BCA92_15415 | 835              | GGC -> GGT | G -> G | S        | -   | macrolide ABC transporter permease/ATP-binding protein MacB |
| 2992160 | NZ_CP022003.1 | intergenic |             |                  |            |        |          |     |                                                             |
| 3003806 | NZ_CP022003.1 | coding     | BCA92_15555 | 433              | CCG -> CCT | P -> P | S        | -   | polyamine ABC transporter ATP-binding protein               |
| 3081209 | NZ_CP022003.1 | coding     | BCA92_15945 | <i>potG</i> 226  | TTC -> TTA | F -> L | N        | -   | molybdopterin synthase sulfur carrier subunit               |
| 3112990 | NZ_CP022003.1 | coding     | BCA92_16100 | <i>moaD</i> 759  | AAA -> AAT | K -> N | N        | +   | UDP-glucose 4-epimerase                                     |
| 3126229 | NZ_CP022003.1 | coding     | BCA92_16165 | <i>galE</i> 733  | CAT -> TAT | H -> Y | N        | +   | LysR family transcriptional regulator                       |
| 3191555 | NZ_CP022003.1 | intergenic |             |                  |            |        |          |     |                                                             |
| 3196084 | NZ_CP022003.1 | intergenic |             |                  |            |        |          |     |                                                             |
| 3228078 | NZ_CP022003.1 | coding     | BCA92_16700 | 457              | GGA -> GGC | G -> G | S        | -   | galactonate dehydratase                                     |
| 3248933 | NZ_CP022003.1 | intergenic |             |                  |            |        |          |     |                                                             |
| 3251648 | NZ_CP022003.1 | coding     | BCA92_16825 | <i>dpiB</i> 253  | GTG -> GTT | V -> V | S        | -   | histidine kinase                                            |
| 3256983 | NZ_CP022003.1 | coding     | BCA92_16845 | <i>citF</i> 1258 | ATG -> CTG | M -> L | N        | +   | citrate lyase subunit alpha                                 |
| 3347362 | NZ_CP022003.1 | coding     | BCA92_17325 | 587              | CCG -> CTG | P -> L | N        | -   | uracil/xanthine transporter                                 |
| 3379696 | NZ_CP022003.1 | pseudogene | BCA92_17470 | <i>ushA</i> 1531 | GAT -> GAG | D -> E | N        | -   | bifunctional UDP-sugar hydrolase/5'-nucleotidase            |
| 3399407 | NZ_CP022003.1 | coding     | BCA92_17565 | 246              | AGT -> GGT | S -> G | N        | -   | DNA-binding transcriptional repressor AcrR                  |
| 3407165 | NZ_CP022003.1 | coding     | BCA92_17605 | 208              | AGA -> AGC | R -> S | N        | -   | 50S ribosomal protein L31                                   |
| 3431995 | NZ_CP022003.1 | intergenic |             |                  |            |        |          |     |                                                             |
| 3439044 | NZ_CP022003.1 | coding     | BCA92_17760 | 57               | ATA -> ATG | I -> M | N        | +   | cytochrome o ubiquinol oxidase subunit IV                   |
| 3511771 | NZ_CP022003.1 | coding     | BCA92_18120 | <i>prpE</i> 1710 | CGC -> TGC | R -> C | N        | -   | propionate--CoA ligase                                      |
| 3513417 | NZ_CP022003.1 | coding     | BCA92_18125 | 1429             | ATC -> ATT | I -> I | S        | -   | 2-methylcitrate dehydratase                                 |
| 3561008 | NZ_CP022003.1 | coding     | BCA92_18345 | 13               | CAG -> CAA | Q -> Q | S        | -   | MFS transporter                                             |
| 3608574 | NZ_CP022003.1 | coding     | BCA92_18615 | 471              | ACC -> GCC | T -> A | N        | -   | class I SAM-dependent methyltransferase                     |



|         |               |            |             |             |      |            |        |     |     |                                                                    |
|---------|---------------|------------|-------------|-------------|------|------------|--------|-----|-----|--------------------------------------------------------------------|
| 3657928 | NZ_CP022003.1 | coding     | BCA92_18860 | <i>dapD</i> | 117  | GAT -> GAC | D -> D | S   | +   | 2,3,4,5-tetrahydropyridine-2,6-dicarboxylate N-succinyltransferase |
| 3664856 | NZ_CP022003.1 | coding     | BCA92_18880 |             | 975  | TAT -> GAT | Y -> D | N   | -   | carbohydrate diacid regulon transcriptional regulator CdaR         |
| 3671905 | NZ_CP022003.1 | coding     | BCA92_18915 |             | 877  | GCG -> GCA | A -> A | S   | -   | ClC family H(+)/Cl(-) exchange transporter                         |
| 3675086 | NZ_CP022003.1 | coding     | BCA92_18930 |             | 240  | ACC -> CCC | T -> P | N   | -   | fimbrial protein                                                   |
| 3716332 | NZ_CP022003.1 | coding     | BCA92_19115 |             | 163  | ACC -> GCC | T -> A | N   | +   | S-adenosylmethionine decarboxylase proenzyme                       |
| 3725950 | NZ_CP022003.1 | intergenic |             |             |      |            |        |     |     |                                                                    |
| 3783348 | NZ_CP022003.1 | coding     | BCA92_19405 | <i>leuC</i> | 1168 | AGT -> GGT | S -> G | N   | +   | 3-isopropylmalate dehydratase large subunit                        |
| 3792361 | NZ_CP022003.1 | coding     | BCA92_19455 | <i>araB</i> | 89   | AGC -> AAC | S -> N | N   | +   | ribulokinase                                                       |
| 3817746 | NZ_CP022003.1 | intergenic |             |             |      |            |        |     |     |                                                                    |
| 3824894 | NZ_CP022003.1 | coding     | BCA92_19615 |             | 144  | GTT -> TTT | V -> F | N   | -   | hypothetical protein                                               |
| 3830021 | NZ_CP022003.1 | coding     | BCA92_19635 |             | 772  | ATA -> GTA | I -> V | N   | +   | ATP-dependent acyl-CoA ligase                                      |
| 3838386 | NZ_CP022003.1 | coding     | BCA92_19670 |             | 36   | GAC -> AAC | D -> N | N   | -   | 4-hydroxy-tetrahydrodipicolinate reductase                         |
| 3867089 | NZ_CP022003.1 | intergenic |             |             |      |            |        |     |     |                                                                    |
| 3932075 | NZ_CP022003.1 | coding     | BCA92_20095 |             | 296  | AAC -> AGC | N -> S | N   | +   | energy-dependent translational throttle protein EttA               |
| 3943047 | NZ_CP022003.1 | coding     | BCA92_20145 | <i>deoA</i> | 139  | GGT -> GGG | G -> G | S   | -   | thymidine phosphorylase                                            |
| 3976262 | NZ_CP022003.1 | coding     | BCA92_20320 |             | 1437 | ATG -> GTG | M -> V | N   | -   | methyl-accepting chemotaxis protein II                             |
| 4002577 | NZ_CP022003.1 | intergenic |             |             |      |            |        |     |     |                                                                    |
| 4006268 | NZ_CP022003.1 | coding     | BCA92_20455 |             | 92   | ACA -> ATA | T -> I | N   | -   | aspartate racemase                                                 |
| 4019804 | NZ_CP022003.1 | coding     | BCA92_20550 |             | 183  | CTA -> CTG | L -> L | S   | +   | hypothetical protein                                               |
| 4033372 | NZ_CP022003.1 | coding     | BCA92_20645 |             | 460  | GGC -> AGC | G -> S | N   | +   | alcohol dehydrogenase                                              |
| 4040680 | NZ_CP022003.1 | coding     | BCA92_20680 |             | 423  | TTC -> CTC | F -> L | N   | -   | LPS export ABC transporter permease LptF                           |
| 4081583 | NZ_CP022003.1 | coding     | BCA92_20895 |             | 1046 | ACG -> ATG | T -> M | N   | -   | metalloprotease PmbA                                               |
| 4177866 | NZ_CP022003.1 | coding     | BCA92_21425 |             | 219  | GCT -> GCC | A -> A | S   | +   | phosphatase PAP2 family protein                                    |
| 4179845 | NZ_CP022003.1 | coding     | BCA92_21440 |             | 100  | GTT -> TTT | V -> F | N   | +   | hypothetical protein                                               |
| 4180343 | NZ_CP022003.1 | coding     | BCA92_21445 |             | 111  | CTG -> CTA | L -> L | S   | +   | AraC family transcriptional regulator                              |
| 4196744 | NZ_CP022003.1 | coding     | BCA92_21520 |             | 440  | GGT -> GAT | G -> D | N   | -   | melibiose/sodium symporter                                         |
| 4247272 | NZ_CP022003.1 | coding     | BCA92_21725 |             | 4837 | GAT -> GAC | D -> D | S   | -   | Ig-like domain repeat protein                                      |
| 4327025 | NZ_CP022003.1 | coding     | BCA92_22050 | <i>rrf</i>  | 106  | C -> G     | N/A    | N/A | N/A | 5S ribosomal RNA                                                   |
| 4345465 | NZ_CP022003.1 | coding     | BCA92_22130 |             | 1247 | CTG -> CAG | L -> Q | N   | +   | phosphomethylpyrimidine synthase                                   |
| 4446379 | NZ_CP022003.1 | coding     | BCA92_22620 |             | 790  | CAA -> CAG | Q -> Q | S   | -   | autoinducer 2 import ATP-binding protein LsrA                      |
| 4465675 | NZ_CP022003.1 | coding     | BCA92_22730 |             | 303  | GGA -> GGC | G -> G | S   | +   | hypothetical protein                                               |
| 4571318 | NZ_CP022003.1 | coding     | BCA92_23255 | <i>corA</i> | 472  | CGC -> CGT | R -> R | S   | -   | magnesium transporter CorA                                         |
| 4579946 | NZ_CP022003.1 | coding     | BCA92_23315 |             | 443  | AAC -> AGC | N -> S | N   | -   | adenylate cyclase                                                  |
| 4580032 | NZ_CP022003.1 | coding     | BCA92_23315 |             | 529  | ACT -> ACC | T -> T | S   | -   | adenylate cyclase                                                  |
| 4594203 | NZ_CP022003.1 | coding     | BCA92_23385 |             | 580  | ACC -> ACT | T -> T | S   | -   | dTDP-4-amino-4,6-dideoxy-D-glucose transaminase                    |
| 4603094 | NZ_CP022003.1 | intergenic |             |             |      |            |        |     |     |                                                                    |
| 4656020 | NZ_CP022003.1 | intergenic |             |             |      |            |        |     |     |                                                                    |

*B2 (10 samples / 11 SNPs)*

|         |               |            |             |             |      |            |        |   |   |                                                    |
|---------|---------------|------------|-------------|-------------|------|------------|--------|---|---|----------------------------------------------------|
| 1090131 | NZ_CP022003.1 | coding     | BCA92_05535 |             | 193  | GCG -> GCA | A -> A | S | - | transcriptional regulator                          |
| 1750882 | NZ_CP022003.1 | coding     | BCA92_08690 |             | 267  | TAC -> TAT | Y -> Y | S | + | colanic acid biosynthesis glycosyltransferase WcaA |
| 2070127 | NZ_CP022003.1 | coding     | BCA92_10520 | <i>astB</i> | 115  | CGT -> TGT | R -> C | N | + | succinylarginine dihydrolase                       |
| 2371470 | NZ_CP022003.1 | intergenic |             |             |      |            |        |   |   |                                                    |
| 2584589 | NZ_CP022003.1 | coding     | BCA92_13245 |             | 1446 | CTG -> CTA | L -> L | S | + | hydrogenase 2 large subunit                        |
| 2748916 | NZ_CP022003.1 | coding     | BCA92_14205 |             | 597  | AGC -> AGT | S -> S | S | + | tyrosine transporter TyrP                          |
| 2818725 | NZ_CP022003.1 | intergenic |             |             |      |            |        |   |   |                                                    |
| 4066198 | NZ_CP022003.1 | coding     | BCA92_20815 |             | 704  | CTA -> CCA | L -> P | N | + | PTS trehalose transporter subunit IIBC             |
| 4233664 | NZ_CP022003.1 | coding     | BCA92_21680 |             | 1368 | CTG -> TTG | L -> L | S | - | Na <sup>+</sup> /H <sup>+</sup> antiporter         |
| 4267308 | NZ_CP022003.1 | coding     | BCA92_21765 |             | 1758 | TCG -> TCA | S -> S | S | + | excinuclease ABC subunit A                         |
| 4302445 | NZ_CP022003.1 | coding     | BCA92_21935 |             | 630  | GAA -> GAG | E -> E | S | + | lysine-sensitive aspartokinase 3                   |

*B3 (2 samples / 23 SNPs)*

|      |               |        |             |  |     |            |        |   |   |                       |
|------|---------------|--------|-------------|--|-----|------------|--------|---|---|-----------------------|
| 7774 | NZ_CP022003.1 | coding | BCA92_00030 |  | 575 | CGC -> CAC | R -> H | N | - | MR-MLE family protein |
|------|---------------|--------|-------------|--|-----|------------|--------|---|---|-----------------------|

|                                       |               |            |             |                  |            |        |     |     |                                                                           |  |  |  |  |
|---------------------------------------|---------------|------------|-------------|------------------|------------|--------|-----|-----|---------------------------------------------------------------------------|--|--|--|--|
| 74071                                 | NZ_CP022003.1 | intergenic |             |                  |            |        |     |     |                                                                           |  |  |  |  |
| 138368                                | NZ_CP022003.1 | coding     | BCA92_00665 | 391              | GGT -> GGC | G -> G | S   | -   | murein hydrolase activator EnvC                                           |  |  |  |  |
| 157210                                | NZ_CP022003.1 | coding     | BCA92_00745 | 15               | AAG -> GAG | K -> E | N   | -   | hypothetical protein                                                      |  |  |  |  |
| 790283                                | NZ_CP022003.1 | coding     | BCA92_03940 | 201              | GGC -> GGA | G -> G | S   | +   | alpha/beta hydrolase                                                      |  |  |  |  |
| 989552                                | NZ_CP022003.1 | intergenic |             |                  |            |        |     |     |                                                                           |  |  |  |  |
| 997019                                | NZ_CP022003.1 | coding     | BCA92_04990 | <i>spaK</i> 199  | CAA -> AAA | Q -> K | N   | +   | surface presentation of antigens protein SpaK                             |  |  |  |  |
| 1727639                               | NZ_CP022003.1 | coding     | BCA92_08610 | 1348             | CAG -> CAA | Q -> Q | S   | -   | MFS transporter                                                           |  |  |  |  |
| 1905554                               | NZ_CP022003.1 | intergenic |             |                  |            |        |     |     |                                                                           |  |  |  |  |
| 2195899                               | NZ_CP022003.1 | intergenic |             |                  |            |        |     |     |                                                                           |  |  |  |  |
| 2484053                               | NZ_CP022003.1 | coding     | BCA92_12710 | 124              | TCG -> GCG | S -> A | N   | +   | ABC transporter ATP-binding protein                                       |  |  |  |  |
| 2584509                               | NZ_CP022003.1 | coding     | BCA92_13245 | 1366             | GCG -> ACG | A -> T | N   | +   | hydrogenase 2 large subunit                                               |  |  |  |  |
| 2614203                               | NZ_CP022003.1 | coding     | BCA92_13405 | 76               | ATT -> GTT | I -> V | N   | +   | hypothetical protein                                                      |  |  |  |  |
| 2897817                               | NZ_CP022003.1 | coding     | BCA92_15070 | 1591             | AGC -> AGA | S -> R | N   | -   | phage tail protein                                                        |  |  |  |  |
| 3314285                               | NZ_CP022003.1 | intergenic |             |                  |            |        |     |     |                                                                           |  |  |  |  |
| 3576390                               | NZ_CP022003.1 | coding     | BCA92_18425 | 480              | GCC -> GCT | A -> A | S   | +   | transpeptidase                                                            |  |  |  |  |
| 3812870                               | NZ_CP022003.1 | coding     | BCA92_19540 | 141              | ACC -> GCC | T -> A | N   | -   | glutathione-regulated potassium-efflux system protein KefC                |  |  |  |  |
| 3940879                               | NZ_CP022003.1 | coding     | BCA92_20135 | <i>deoD</i> 175  | GAA -> GAC | E -> D | N   | -   | purine-nucleoside phosphorylase                                           |  |  |  |  |
| 3970776                               | NZ_CP022003.1 | coding     | BCA92_20305 | 39               | CGG -> TGG | R -> W | N   | -   | PTS system mannose/fructose/N-acetylgalactosamine-transporter subunit IIB |  |  |  |  |
| 4077799                               | NZ_CP022003.1 | coding     | BCA92_20865 | 493              | GCG -> GCA | A -> A | S   | -   | hypothetical protein                                                      |  |  |  |  |
| 4098712                               | NZ_CP022003.1 | coding     | BCA92_20970 | 536              | GCC -> GAC | A -> D | N   | -   | 3'(2'),5'-bisphosphate nucleotidase CysQ                                  |  |  |  |  |
| 4366160                               | NZ_CP022003.1 | tRNA       | BCA92_22240 | 47               | C -> T     | N/A    | N/A | N/A | tRNA-Thr                                                                  |  |  |  |  |
| 4545348                               | NZ_CP022003.1 | coding     | BCA92_23125 | 457              | GTG -> GTT | V -> V | S   | -   | 3-octaprenyl-4-hydroxybenzoate decarboxylase                              |  |  |  |  |
| <i>B3&amp;4 (8 samples / 52 SNPs)</i> |               |            |             |                  |            |        |     |     |                                                                           |  |  |  |  |
| 105233                                | NZ_CP022003.1 | coding     | BCA92_00480 | 379              | TAC -> TAT | Y -> Y | S   | -   | guanylate kinase                                                          |  |  |  |  |
| 286760                                | NZ_CP022003.1 | coding     | BCA92_01315 | 890              | CCG -> CTG | P -> L | N   | +   | hypothetical protein                                                      |  |  |  |  |
| 417133                                | NZ_CP022003.1 | coding     | BCA92_01895 | 25               | CGC -> AGC | R -> S | N   | +   | cell filamentation protein Fic                                            |  |  |  |  |
| 524011                                | NZ_CP022003.1 | coding     | BCA92_02545 | 753              | GCT -> GCC | A -> A | S   | +   | cell division protein ZapE                                                |  |  |  |  |
| 809540                                | NZ_CP022003.1 | ncRNA      | BCA92_04045 | <i>ssrS</i> 131  | C -> A     | N/A    | N/A | N/A | N/A                                                                       |  |  |  |  |
| 912776                                | NZ_CP022003.1 | coding     | BCA92_04565 | 517              | GTG -> GTA | V -> V | S   | -   | NADPH-dependent 7-cyano-7-deazaguanine reductase QueF                     |  |  |  |  |
| 1078356                               | NZ_CP022003.1 | coding     | BCA92_05445 | 441              | AAT -> GAT | N -> D | N   | -   | glycine betaine/L-proline ABC transporter ATP-binding protein             |  |  |  |  |
| 1174644                               | NZ_CP022003.1 | intergenic |             |                  |            |        |     |     |                                                                           |  |  |  |  |
| 1256808                               | NZ_CP022003.1 | intergenic |             |                  |            |        |     |     |                                                                           |  |  |  |  |
| 1370967                               | NZ_CP022003.1 | coding     | BCA92_06805 | 212              | GCG -> GTG | A -> V | N   | +   | hypothetical protein                                                      |  |  |  |  |
| 1389082                               | NZ_CP022003.1 | coding     | BCA92_06895 | 478              | ATG -> TTG | M -> L | N   | +   | ethanolamine ammonia-lyase light chain                                    |  |  |  |  |
| 1459551                               | NZ_CP022003.1 | coding     | BCA92_07290 | <i>fadI</i> 1141 | TTC -> CTC | F -> L | N   | +   | acetyl-CoA C-acyltransferase FadI                                         |  |  |  |  |
| 1499099                               | NZ_CP022003.1 | coding     | BCA92_07495 | 190              | TGG -> TGT | W -> C | N   | -   | thiol:disulfide oxidoreductase                                            |  |  |  |  |
| 1683776                               | NZ_CP022003.1 | coding     | BCA92_08395 | 493              | TTC -> CTC | F -> L | N   | +   | transporter                                                               |  |  |  |  |
| 1690707                               | NZ_CP022003.1 | coding     | BCA92_08425 | 269              | CTG -> CGG | L -> R | N   | +   | osmoprotectant uptake system permease                                     |  |  |  |  |
| 1713836                               | NZ_CP022003.1 | coding     | BCA92_08545 | 1056             | GTA -> ATA | V -> I | N   | -   | nucleoside permease                                                       |  |  |  |  |
| 1798704                               | NZ_CP022003.1 | coding     | BCA92_08915 | <i>hisD</i> 21   | GCC -> TCC | A -> S | N   | -   | histidinol dehydrogenase                                                  |  |  |  |  |
| 1883583                               | NZ_CP022003.1 | intergenic |             |                  |            |        |     |     |                                                                           |  |  |  |  |
| 1893633                               | NZ_CP022003.1 | intergenic |             |                  |            |        |     |     |                                                                           |  |  |  |  |
| 1941777                               | NZ_CP022003.1 | coding     | BCA92_09795 | 1569             | GGC -> GGT | G -> G | S   | +   | flagellar hook-associated protein FlgK                                    |  |  |  |  |
| 2084714                               | NZ_CP022003.1 | coding     | BCA92_10605 | 543              | GTG -> ATG | V -> M | N   | -   | L-cystine transporter                                                     |  |  |  |  |
| 2240677                               | NZ_CP022003.1 | coding     | BCA92_11425 | <i>pntA</i> 867  | GGC -> GGT | G -> G | S   | +   | NAD(P)(+) transhydrogenase (Re/Si-specific) subunit alpha                 |  |  |  |  |
| 2274445                               | NZ_CP022003.1 | coding     | BCA92_11605 | 643              | CGC -> TGC | R -> C | N   | +   | dipeptidyl carboxypeptidase II                                            |  |  |  |  |
| 2281091                               | NZ_CP022003.1 | coding     | BCA92_11645 | 112              | GTG -> GTA | V -> V | S   | -   | multiple antibiotic resistance regulatory periplasmic protein MarB        |  |  |  |  |
| 2551856                               | NZ_CP022003.1 | coding     | BCA92_13105 | <i>narI</i> 28   | AAA -> AAG | K -> K | S   | -   | respiratory nitrate reductase subunit gamma                               |  |  |  |  |
| 2571089                               | NZ_CP022003.1 | coding     | BCA92_13190 | 301              | GTG -> GTA | V -> V | S   | -   | glutamyl-tRNA reductase                                                   |  |  |  |  |
| 2650520                               | NZ_CP022003.1 | intergenic |             |                  |            |        |     |     |                                                                           |  |  |  |  |
| 2652657                               | NZ_CP022003.1 | intergenic |             |                  |            |        |     |     |                                                                           |  |  |  |  |
| 2677521                               | NZ_CP022003.1 | intergenic |             |                  |            |        |     |     |                                                                           |  |  |  |  |

|                                 |               |            |             |             |      |            |        |          |     |                                                          |  |
|---------------------------------|---------------|------------|-------------|-------------|------|------------|--------|----------|-----|----------------------------------------------------------|--|
| 3039272                         | NZ_CP022003.1 | intergenic |             |             |      |            |        |          |     |                                                          |  |
| 3043866                         | NZ_CP022003.1 | intergenic |             |             |      |            |        |          |     |                                                          |  |
| 3138555                         | NZ_CP022003.1 | coding     | BCA92_16260 | <i>tolA</i> | 631  | GTA -> GCG | V -> A | N        | -   | cell envelope integrity protein TolA                     |  |
| 3138556                         | NZ_CP022003.1 | coding     | BCA92_16260 | <i>tolA</i> | 632  | GTA -> GCG | V -> A | N        | -   | cell envelope integrity protein TolA                     |  |
| 3171264                         | NZ_CP022003.1 | coding     | BCA92_16425 |             | 56   | CCG -> CTG | P -> L | N        | +   | two-component sensor histidine kinase                    |  |
| 3230616                         | NZ_CP022003.1 | coding     | BCA92_16710 | <i>leuS</i> | 1228 | GAA -> AAA | E -> K | N        | +   | leucine--tRNA ligase                                     |  |
| 3315626                         | NZ_CP022003.1 | intergenic |             |             |      |            |        |          |     |                                                          |  |
| 3369806                         | NZ_CP022003.1 | coding     | BCA92_17425 |             | 284  | CCG -> CTG | P -> L | N        | -   | iron export ABC transporter permease subunit FetB        |  |
| 3379070                         | NZ_CP022003.1 | pseudogene | BCA92_17470 | <i>ushA</i> | 905  | GGC -> GTC | G -> V | N        | -   | bifunctional UDP-sugar hydrolase/5'-nucleotidase         |  |
| 3412411                         | NZ_CP022003.1 | coding     | BCA92_17635 |             | 1022 | GCT -> GTT | A -> V | N        | -   | ammonium transporter                                     |  |
| 3528864                         | NZ_CP022003.1 | coding     | BCA92_18190 |             | 519  | GCC -> TCC | A -> S | N        | -   | site-specific DNA-methyltransferase                      |  |
| 3564570                         | NZ_CP022003.1 | intergenic |             |             |      |            |        |          |     |                                                          |  |
| 3646276                         | NZ_CP022003.1 | coding     | BCA92_18795 | <i>rseP</i> | 700  | CGC -> CGT | R -> R | S        | -   | RIP metalloprotease RseP                                 |  |
| 3818274                         | NZ_CP022003.1 | intergenic |             |             |      |            |        |          |     |                                                          |  |
| 3822909                         | NZ_CP022003.1 | intergenic |             |             |      |            |        |          |     |                                                          |  |
| 3884341                         | NZ_CP022003.1 | coding     | BCA92_19875 |             | 602  | GGT -> GCT | G -> A | N        | -   | fimbrial adhesin FimH                                    |  |
| 3975167                         | NZ_CP022003.1 | coding     | BCA92_20320 |             | 342  | ACC -> CCC | T -> P | N        | -   | methyl-accepting chemotaxis protein II                   |  |
| 3991859                         | NZ_CP022003.1 | coding     | BCA92_20385 |             | 1685 | CGC -> CTC | R -> L | N        | +   | type I restriction endonuclease                          |  |
| 4001324                         | NZ_CP022003.1 | coding     | BCA92_20425 |             | 552  | TTA -> TTG | L -> L | S        | +   | MFS transporter                                          |  |
| 4070632                         | NZ_CP022003.1 | coding     | BCA92_20825 |             | 1609 | TAC -> CAC | Y -> H | N        | +   | anaerobic ribonucleoside triphosphate reductase          |  |
| 4103620                         | NZ_CP022003.1 | intergenic |             |             |      |            |        |          |     |                                                          |  |
| 4114107                         | NZ_CP022003.1 | coding     | BCA92_21080 | <i>araD</i> | 231  | GAG -> TAG | E -> * | nonsense | -   | L-ribulose-5-phosphate 4-epimerase                       |  |
| 4320783                         | NZ_CP022003.1 | coding     | BCA92_22020 |             | 612  | GAT -> TAT | D -> Y | N        | -   | bifunctional isocitrate dehydrogenase kinase/phosphatase |  |
| <i>B4 (6 samples / 16 SNPs)</i> |               |            |             |             |      |            |        |          |     |                                                          |  |
| 579355                          | NZ_CP022003.1 | coding     | BCA92_02850 |             | 20   | ACA -> ATA | T -> I | N        | +   | ribosome maturation factor                               |  |
| 1157947                         | NZ_CP022003.1 | tmRNA      | BCA92_05935 | <i>ssrA</i> | 339  | A -> G     | N/A    | N/A      | N/A |                                                          |  |
| 1266389                         | NZ_CP022003.1 | pseudogene | BCA92_06405 | <i>asrA</i> | 612  | GTC -> GCC | V -> A | N        | -   | anaerobic sulfite reductase subunit A                    |  |
| 1280375                         | NZ_CP022003.1 | intergenic |             |             |      |            |        |          |     |                                                          |  |
| 1464794                         | NZ_CP022003.1 | coding     | BCA92_07315 |             | 448  | GGC -> AGC | G -> S | N        | +   | chorismate synthase                                      |  |
| 1751108                         | NZ_CP022003.1 | coding     | BCA92_08690 |             | 493  | GCC -> TCC | A -> S | N        | +   | colanic acid biosynthesis glycosyltransferase WcaA       |  |
| 1754958                         | NZ_CP022003.1 | coding     | BCA92_08710 | <i>wcaE</i> | 594  | GGC -> GGA | G -> G | S        | +   | colanic acid biosynthesis glycosyltransferase WcaE       |  |
| 2761556                         | NZ_CP022003.1 | coding     | BCA92_14290 |             | 447  | GAT -> AAT | D -> N | N        | -   | cystine ABC transporter substrate-binding protein        |  |
| 3155980                         | NZ_CP022003.1 | intergenic |             |             |      |            |        |          |     |                                                          |  |
| 3234488                         | NZ_CP022003.1 | coding     | BCA92_16730 |             | 264  | GCC -> ACC | A -> T | N        | -   | threonine-phosphate decarboxylase                        |  |
| 3246138                         | NZ_CP022003.1 | coding     | BCA92_16785 | <i>lipA</i> | 882  | ATG -> ATA | M -> I | N        | +   | lipoyl synthase                                          |  |
| 3840659                         | NZ_CP022003.1 | coding     | BCA92_19680 | <i>citX</i> | 422  | ACG -> ATG | T -> M | N        | -   | phosphoribosyl-dephospho-CoA transferase                 |  |
| 3843024                         | NZ_CP022003.1 | coding     | BCA92_19690 | <i>citE</i> | 705  | CCG -> TCG | P -> S | N        | -   | citrate lyase subunit beta                               |  |
| 3947396                         | NZ_CP022003.1 | coding     | BCA92_20160 |             | 481  | TGG -> CGG | W -> R | N        | +   | glycine radical enzyme activase                          |  |
| 4352414                         | NZ_CP022003.1 | coding     | BCA92_22190 | <i>rpoC</i> | 46   | CTG -> CTA | L -> L | S        | -   | DNA-directed RNA polymerase subunit beta                 |  |
| 4610825                         | NZ_CP022003.1 | coding     | BCA92_23470 |             | 1243 | TCC -> TCT | S -> S | S        | -   | ketol-acid reductoisomerase                              |  |
